# Supplementary material for: An unusual mixed-valence cobalt dimer as a catalyst for the anti-Markovnikov hydrophosphination of alkynes
Source: Royal Society of Chemistry journal article supplement (doi:10.1039/d2qi00112h), 2022-01-01
Supplement: d2qi00112h1.pdf [file d2qi00112h1.pdf]

**Electronic Supplementary Information**

**An Unusual Mixed Valent Cobalt Dimer as a Catalyst for Anti-Markovnikov Hydrophopination of Alkynes**

Pardeep Kumar, Asmita Sen, Gopalan Rajaraman\*, and Maheswaran Shanmugam\*

<sup>a</sup>Department of Chemistry, Indian Institute of Technology Bombay, Mumbai-400076, INDIA.

**Table S1** Table for Crystallographic parameters of **2**.

| <b>Complex</b>                         | <b>2</b>                                                                      |
|----------------------------------------|-------------------------------------------------------------------------------|
| Formula                                | C <sub>55</sub> H <sub>87</sub> Co <sub>2</sub> N <sub>3</sub> P <sub>5</sub> |
| Size [mm]                              | 0.11 x 0.16x 0.28                                                             |
| System                                 | Monoclinic                                                                    |
| Space Group                            | P2 <sub>1</sub> /c                                                            |
| a [Å]                                  | 15.1713(4)                                                                    |
| b [Å]                                  | 13.6450(3)                                                                    |
| c [Å]                                  | 27.4359(6)                                                                    |
| α [°]                                  | 90.0                                                                          |
| β [°]                                  | 98.096(2)                                                                     |
| γ [°]                                  | 90.0                                                                          |
| V [Å <sup>3</sup> ]                    | 5623.6(2)                                                                     |
| Z                                      | 4                                                                             |
| ρ <sub>cal.</sub> [g/cm <sup>3</sup> ] | 1.205                                                                         |
| 2θ                                     | 50.0                                                                          |
| Radiation                              | Mo Kα                                                                         |
| λ [Å]                                  | 0.71073                                                                       |
| T [K]                                  | 150                                                                           |
| R1 (%)                                 | 5.27                                                                          |
| wR2 (%)                                | 17.01                                                                         |

**Table S2** The selected bond length of complex **2**.

| <b>Atom</b> | <b>Atom</b> | <b>Bond Length(Å)<br/>(Exptl.)</b> | <b>Bond<br/>Length(Å)(calcd.)</b> |
|-------------|-------------|------------------------------------|-----------------------------------|
| Co1         | P1          | 2.235(4)                           | 2.414                             |
| Co1         | P2          | 2.234(3)                           | 2.307                             |
| Co1         | N3          | 2.000(1)                           | 2.030                             |
| Co1         | N1          | 1.850(1)                           | 1.868                             |
| Co1         | N2          | 2.000(1)                           | 2.024                             |
| Co2         | P4          | 2.194(4)                           | 2.214                             |
| Co2         | P3          | 2.166(4)                           | 2.213                             |
| Co2         | P5          | 2.184(4)                           | 2.212                             |
| Co2         | C10         | 1.910(1)                           | 1.942                             |
| Co2         | C9          | 2.110(1)                           | 2.120                             |
| Co2         | C11         | 2.130(1)                           | 2.122                             |

**Table S3** The Selected bond angle of complex **2**.

| <b>Atom</b> | <b>Atom</b> | <b>Atom</b> | <b>Bond<br/>Angle(Exptl.)/°</b> | <b>Bond Angle<br/>(calc.)/°</b> |
|-------------|-------------|-------------|---------------------------------|---------------------------------|
| P1          | Co1         | P2          | 99.9(1)                         | 95.7                            |
| P1          | Co1         | N3          | 104.8(3)                        | 102.4                           |
| P1          | Co1         | N1          | 86.3(3)                         | 85.9                            |

|     |     |     |          |       |
|-----|-----|-----|----------|-------|
| P1  | Co1 | N2  | 105.6(3) | 101.6 |
| P2  | Co1 | N3  | 99.3(3)  | 98.4  |
| P2  | Co1 | N1  | 173.7(3) | 178.1 |
| P2  | Co1 | N2  | 98.4(3)  | 100.2 |
| N3  | Co1 | N1  | 79.3(4)  | 80.3  |
| N3  | Co1 | N2  | 141.4(4) | 147.8 |
| N1  | Co1 | N2  | 79.4(4)  | 80.3  |
| P4  | Co2 | P3  | 101.8(2) | 103.5 |
| P4  | Co2 | P5  | 102.1(2) | 101.8 |
| P4  | Co2 | C9  | 86.7(4)  | 87.8  |
| P4  | Co2 | C11 | 147.0(4) | 144.4 |
| P3  | Co2 | P5  | 102.6(2) | 100.6 |
| P3  | Co2 | C10 | 136.5(4) | 136.4 |
| P3  | Co2 | C9  | 109.3(4) | 106.6 |
| P3  | Co2 | C11 | 105.9(4) | 108.5 |
| P5  | Co2 | C10 | 103.8(4) | 106.5 |
| P5  | Co2 | C9  | 144.3(4) | 148.1 |
| P5  | Co2 | C11 | 88.9(4)  | 87.2  |
| C10 | Co2 | C9  | 41.0(5)  | 41.6  |
| C10 | Co2 | C11 | 41.4(5)  | 41.5  |
| C9  | Co2 | C11 | 67.6(5)  | 68.7  |

**Table S4** Selected Bond length table for different electronically reduced pincer ligands and calculated average deformation constant.

|              | $d_{C_{im}=N_{im}}$<br>(ave) Å | $d_{Cim-Cpy}$ (av) Å | $\Delta d$ Å (Av. deformation) |
|--------------|--------------------------------|----------------------|--------------------------------|
| 0e Reduction | 1.280                          | 1.493                | 0                              |
| 1e Reduction | 1.330                          | 1.437                | 0.053                          |
| 2e Reduction | 1.337                          | 1.425                | 0.063                          |
| 3e Reduction | 1.394                          | 1.381                | 0.113                          |
| Complex 2    | 1.367                          | 1.402                | 0.090                          |

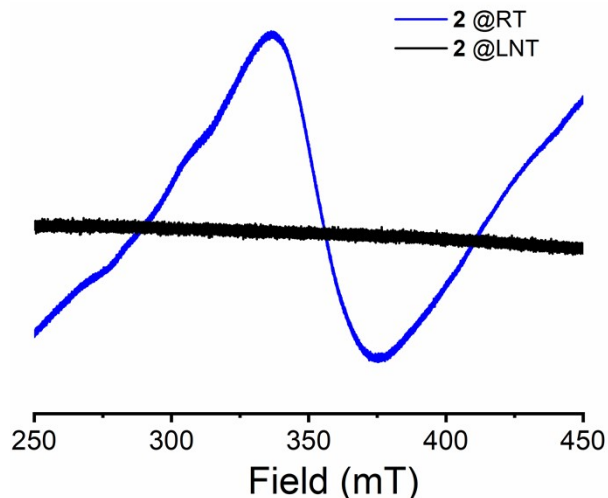

**Fig. S1** The X-band EPR spectra of **2** were recorded in toluene at room temperature (blue trace) and 77 K (black trace) (Experimental condition: Microwave frequency: 9.444 GHz, Modulation Frequency = 100.00 kHz ; Power = 5.0 mW)

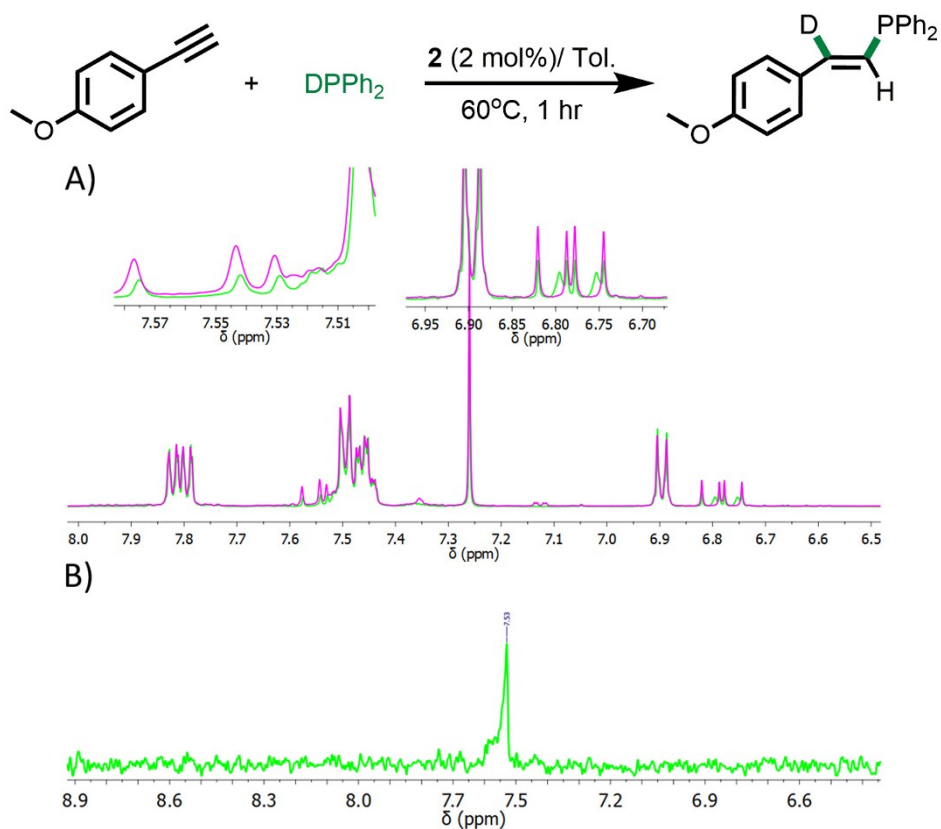

**Fig. S2** Deuterated reaction scheme and their corresponding (A)  $^1\text{H-NMR}$  and (B)  $^2\text{H-NMR}$  spectrum. Suppression in the peak of the internal proton of alkyne suggests the exchange of H by D, which was further confirmed by  $^2\text{H-NMR}$  panel (B).

Spectroscopic data of product formation after sulfidation:

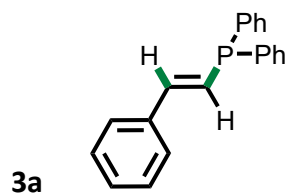

$\delta_{\text{H}}$  (400 MHz,  $\text{CDCl}_3$ ) 7.86 – 7.77 (3 H, m), 7.66 – 7.55 (1 H, m), 7.55 – 7.42 (7 H, m), 7.42 – 7.34 (3 H, m), 6.96 (1 H, dd,  $J$  21.1, 16.7).

$\delta_{\text{C}}$  (101 MHz,  $\text{CDCl}_3$ ) 147.90, 133.88, 133.02, 131.50, 130.11, 128.74, 127.99, 120.18, 119.32.

$\delta_{\text{P}}$  (202 MHz,  $\text{CDCl}_3$ ) 37.19

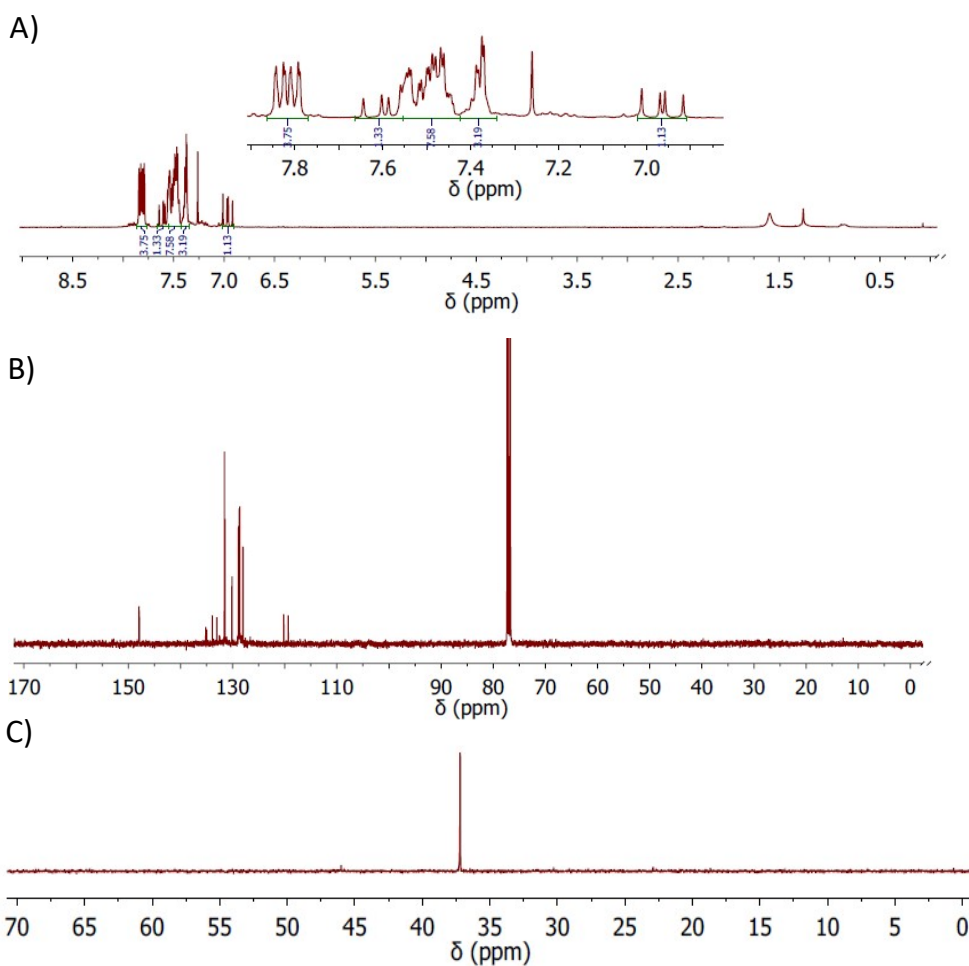

**Fig. S3** Panel **(A)** corresponding to  $^1\text{H}$ -NMR, **(B)** corresponding to  $^{13}\text{C}$ -NMR and **(C)** corresponding to  $^{31}\text{P}$ -NMR.

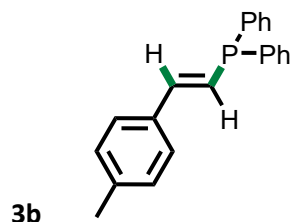

$\delta_{\text{H}}$  (500 MHz,  $\text{CDCl}_3$ ) 7.86 – 7.77 (4H, m), 7.56 (2H, dd,  $J$  22.9, 16.6), 7.52 – 7.41 (8H, m), 7.19 (2H, d,  $J$  7.9), 6.89 (1H, dd,  $J$  21.3, 16.6), 2.37 (3H, s).

$\delta_{\text{C}}$  (126 MHz,  $\text{CDCl}_3$ ) 147.94, 147.89, 140.49, 133.93, 133.24, 132.42, 131.55, 131.50, 131.47, 129.58, 128.71, 128.61, 127.99, 118.63, 117.93, 21.45.

$\delta_{\text{P}}$  (202 MHz,  $\text{CDCl}_3$ ) 37.31

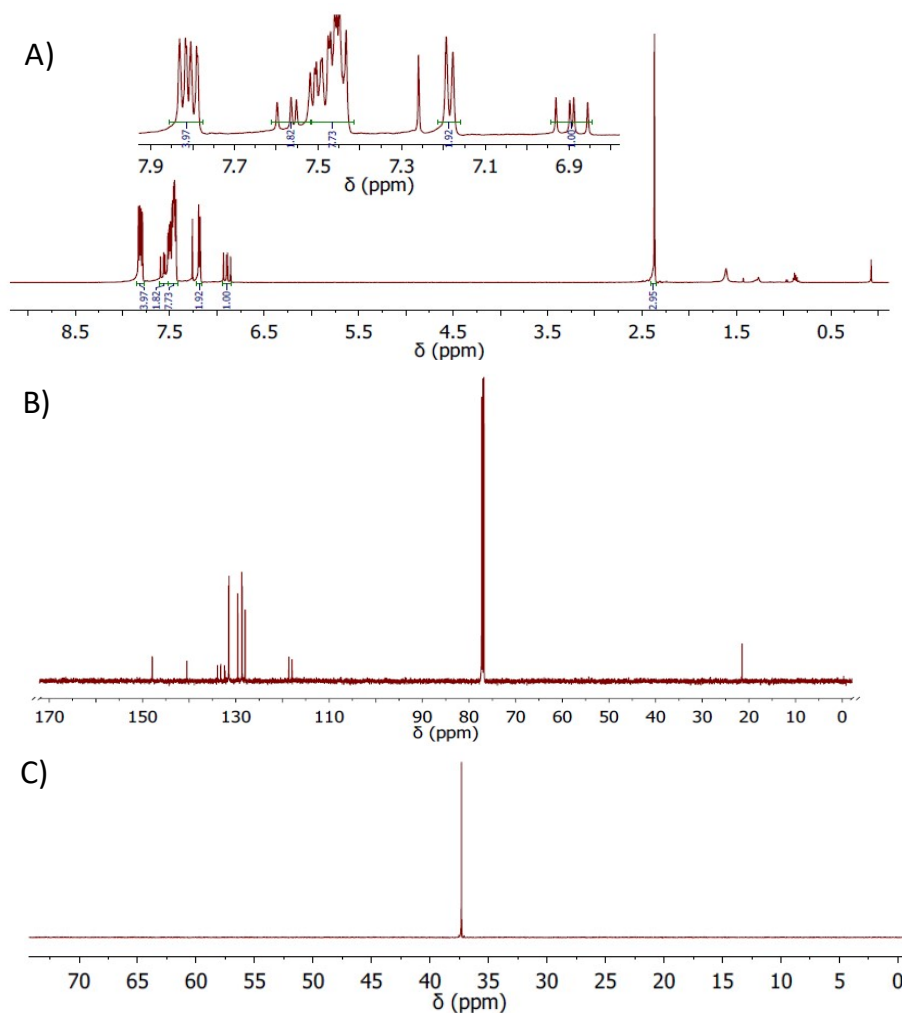

**Fig. S4** Panel **(A)** corresponding to  $^1\text{H-NMR}$ , **(B)** corresponding to  $^{13}\text{C-NMR}$  and **(C)** corresponding to  $^{31}\text{P-NMR}$ .

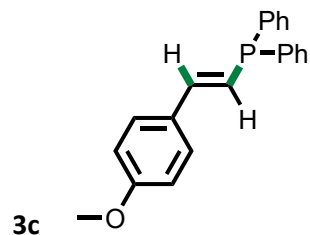

$\delta_{\text{H}}$  (500 MHz,  $\text{CDCl}_3$ ) 7.80 (4H, ddd,  $J$  25.5, 13.5, 12.1), 7.60 – 7.53 (1H, m), 7.52 – 7.41 (8H, m), 6.90 (2H, d,  $J$  8.7), 6.78 (1H, dd,  $J$  21.3, 16.6), 3.83 (3H, s).

$\delta_{\text{C}}$  (126 MHz,  $\text{CDCl}_3$ ) 161.20, 147.58, 134.10, 133.38, 131.53, 129.62, 128.69, 128.59, 116.87, 116.17, 114.24, 55.41.

$\delta_{\text{P}}$  (202 MHz,  $\text{CDCl}_3$ ) 37.43

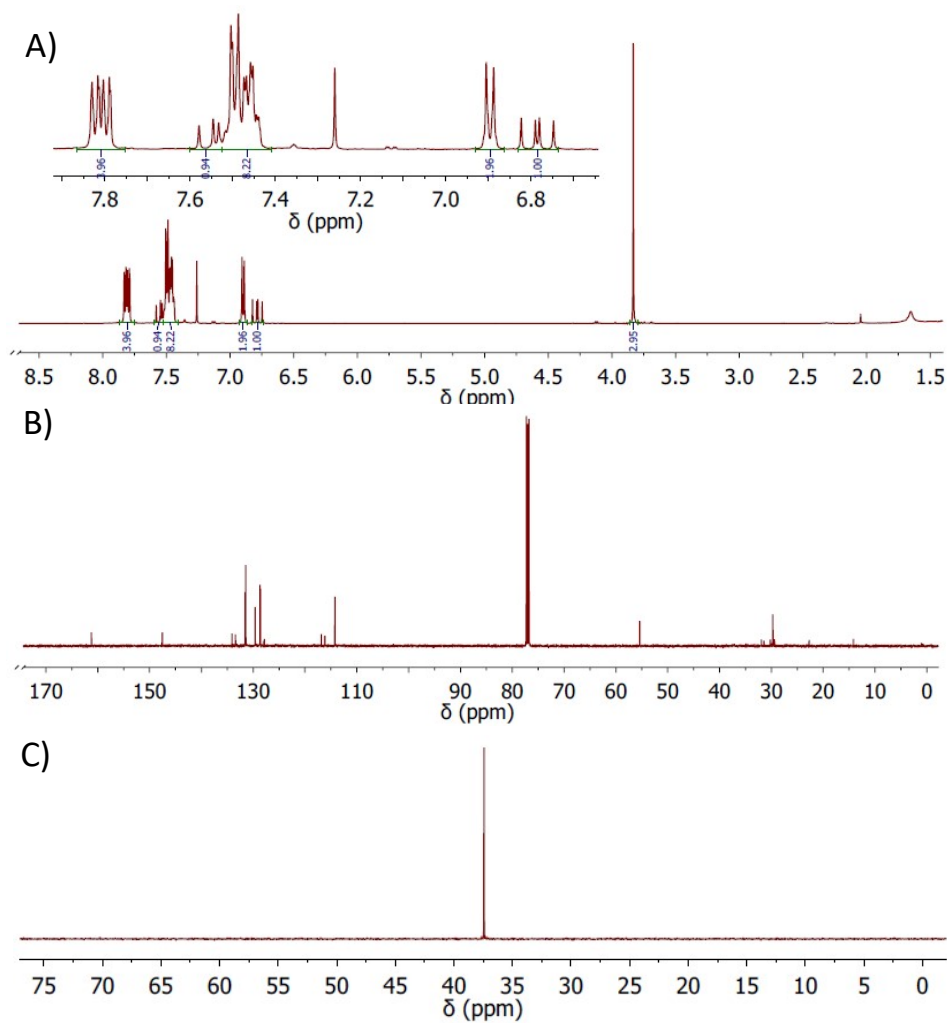

**Fig. S5** Panel **(A)** corresponding to  $^1\text{H-NMR}$ , **(B)** corresponding to  $^{13}\text{C-NMR}$  and **(C)** corresponding to  $^{31}\text{P-NMR}$ .

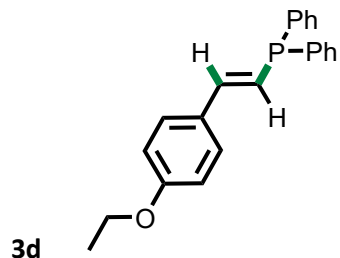

$\delta_{\text{H}}$  (500 MHz,  $\text{CDCl}_3$ ) 7.86 – 7.77 (4H, m), 7.54 (1H, dd,  $J$  16.4, 9.9), 7.51 – 7.42 (8H, m), 6.88 (2H, d,  $J$  8.7), 6.77 (1H, dd,  $J$  21.3, 16.6), 4.06 (2H, q,  $J$  7.0), 1.42 (3H, t,  $J$  7.0).

$\delta_{\text{C}}$  (126 MHz,  $\text{CDCl}_3$ )  $\delta$  160.77, 147.73, 134.20, 133.48, 131.53, 129.62, 128.68, 116.68, 115.98, 114.71, 63.77, 14.89.

$\delta_{\text{P}}$  (202 MHz,  $\text{CDCl}_3$ ) 37.45

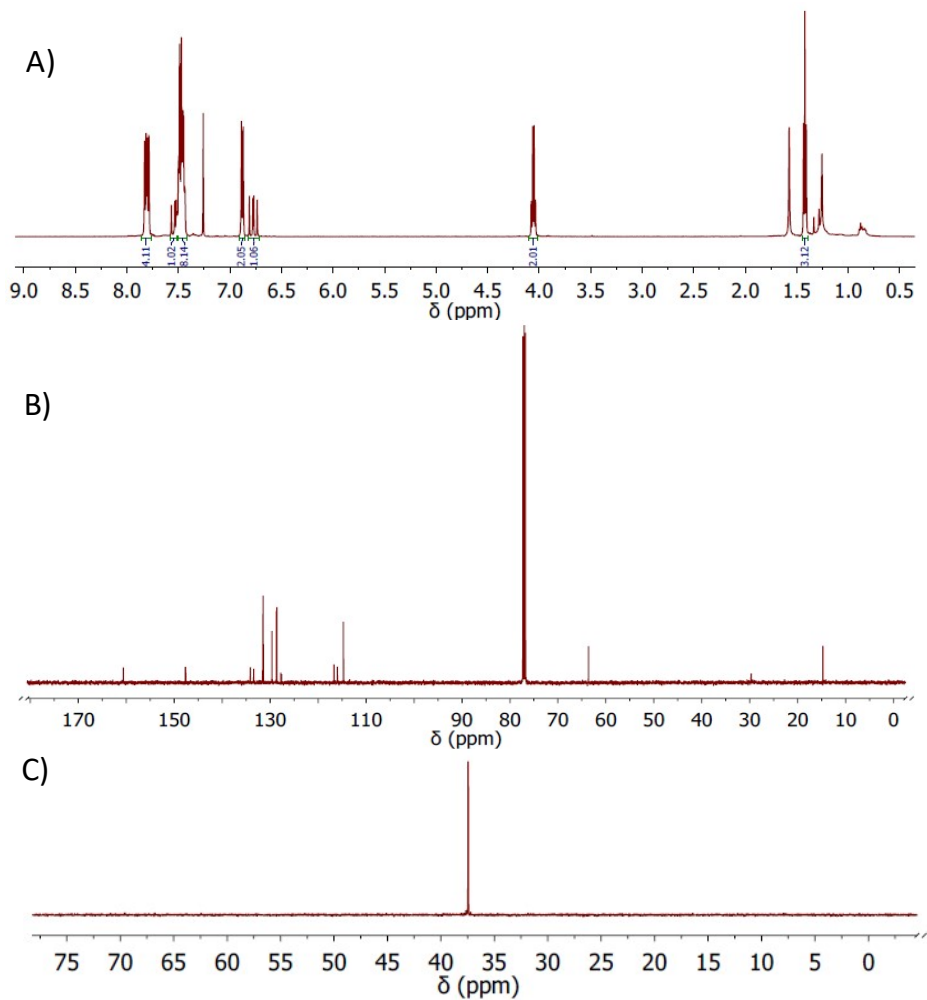

**Fig. S6** Panel **(A)** corresponding to  $^1\text{H-NMR}$ , **(B)** corresponding to  $^{13}\text{C-NMR}$  and **(C)** corresponding to  $^{31}\text{P-NMR}$ .



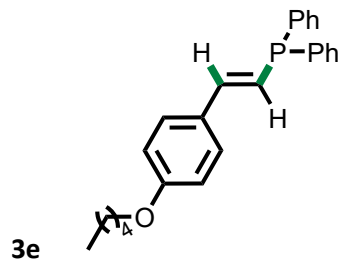

$\delta_{\text{H}}$  (500 MHz,  $\text{CDCl}_3$ ) 7.86 – 7.78 (4H, m), 7.59 – 7.53 (1H, m), 7.52 – 7.41 (8H, m), 6.88 (2H, t,  $J$  8.3), 6.84 – 6.74 (1H, m), 3.97 (2H, t,  $J$  6.6), 1.82 – 1.75 (2H, m), 1.48 – 1.34 (4H, m), 0.93 (3H, dd,  $J$  14.5, 7.3).

$\delta_{\text{C}}$  (126 MHz,  $\text{CDCl}_3$ ) 160.85, 147.69, 134.16, 133.46, 131.54, 129.63, 128.70, 127.65, 116.61, 115.91, 115.02, 114.76, 68.24, 28.49, 22.64, 14.18.

$\delta_{\text{P}}$  (202 MHz,  $\text{CDCl}_3$ ) 37.46

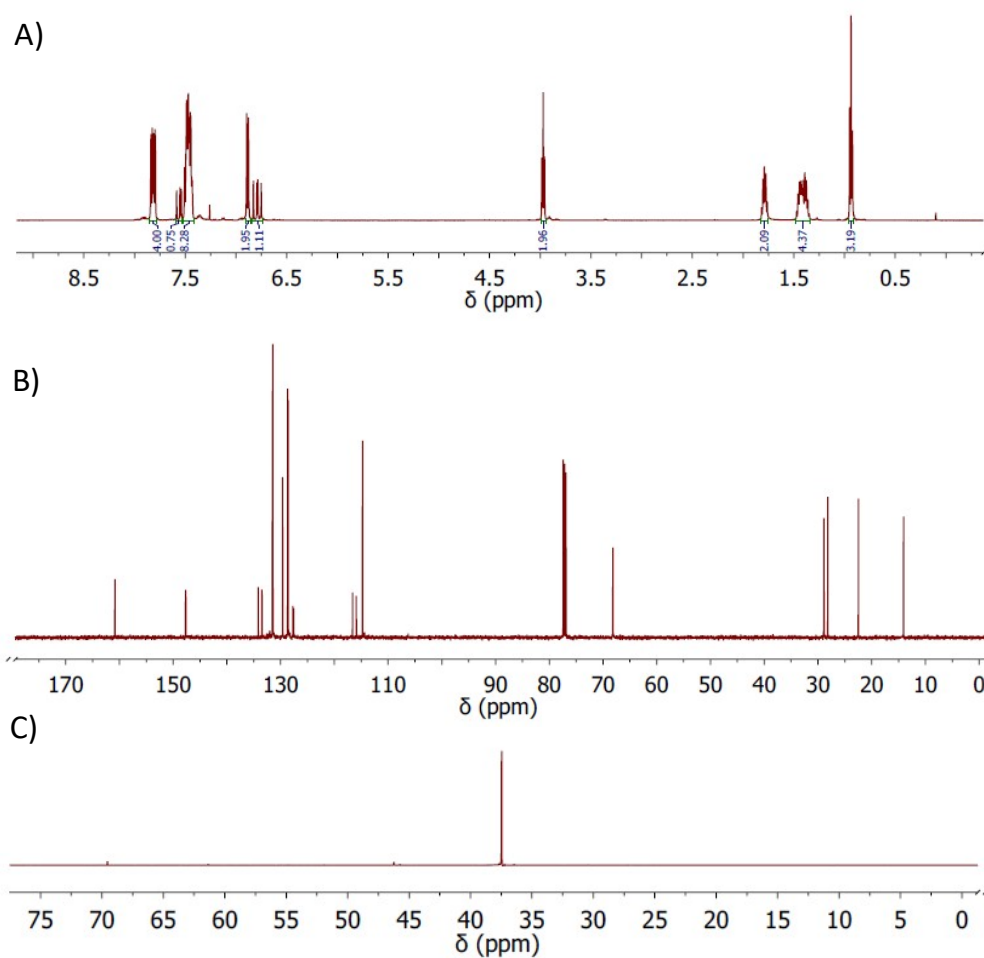

**Fig. S7** Panel **(A)** corresponding to  $^1\text{H-NMR}$ , **(B)** corresponding to  $^{13}\text{C-NMR}$  and **(C)** corresponding to  $^{31}\text{P-NMR}$ .

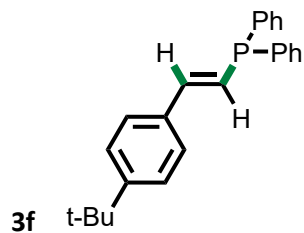

$\delta_{\text{H}}$  (500 MHz,  $\text{CDCl}_3$ ) 7.84 – 7.77 (4H, m), 7.57 (2H, dd,  $J$  22.9, 16.6 Hz), 7.47 (8H, dddd,  $J$  9.8, 7.0, 4.2, 1.8), 7.40 (2H, d,  $J$  8.4), 6.91 (1H, dd,  $J$  21.3, 16.6), 1.32 (9H, s).

$\delta_{\text{C}}$  (126 MHz,  $\text{CDCl}_3$ ) 147.76, 131.55, 131.49, 131.46, 128.70, 128.60, 127.82, 125.83, 118.90, 34.88, 31.19.

$\delta_{\text{P}}$  (202 MHz,  $\text{CDCl}_3$ ) 37.29

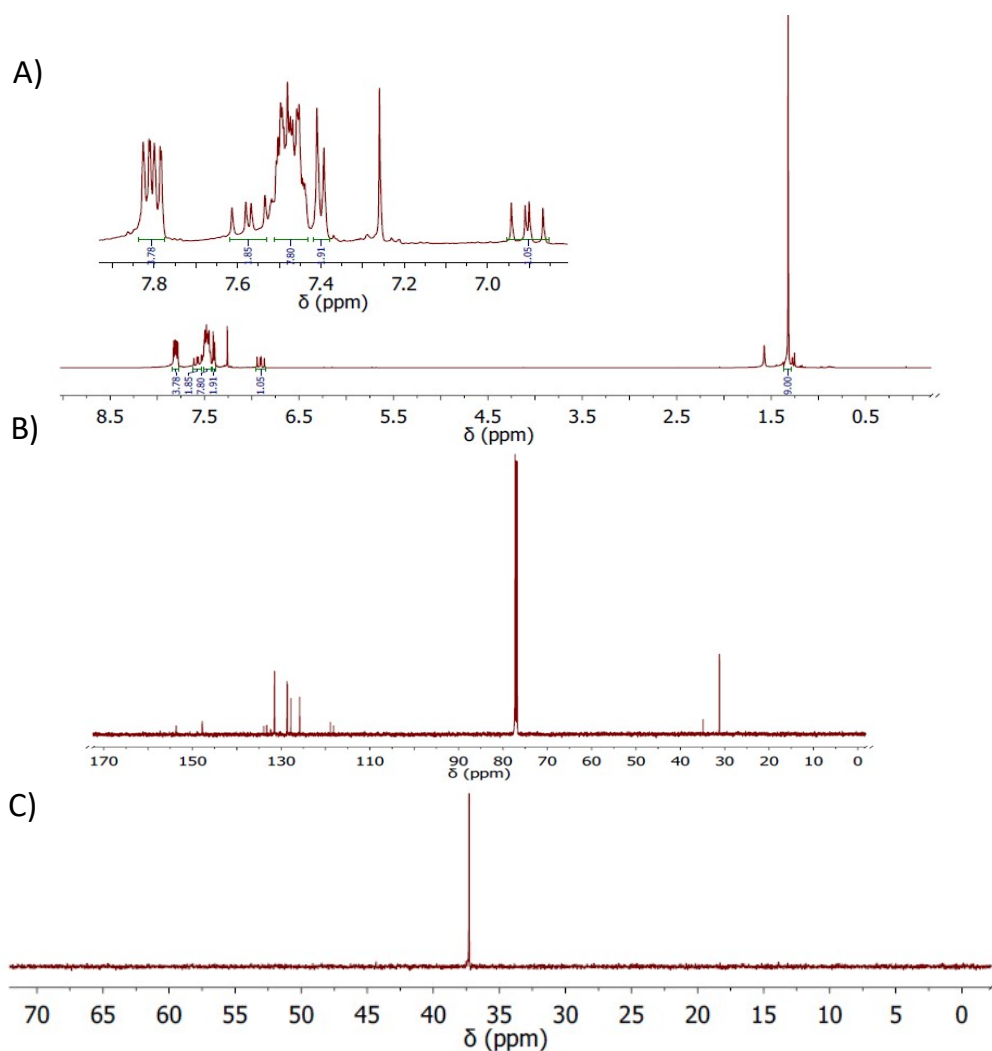

**Fig. S8** Panel **(A)** corresponding to  $^1\text{H-NMR}$ , **(B)** corresponding to  $^{13}\text{C-NMR}$  and **(C)** corresponding to  $^{31}\text{P-NMR}$ .

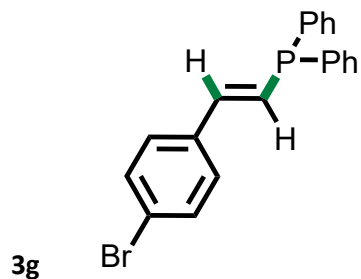

$\delta_{\text{H}}$  (400 MHz,  $\text{CDCl}_3$ ) 7.87 – 7.76 (4 H, m), 7.57 (1 H, dd,  $J$  16.2, 9.9), 7.48 (8 H, tdd,  $J$  6.7, 5.7, 2.1), 7.07 (2 H, t,  $J$  8.6), 6.88 (1 H, dd,  $J$  20.8, 16.7).

$\delta_{\text{C}}$  (101 MHz,  $\text{CDCl}_3$ ) 146.60, 133.83, 132.96, 131.52, 129.86, 128.70, 116.07, 115.85.

$\delta_{\text{P}}$  (162 MHz,  $\text{CDCl}_3$ ) 37.12

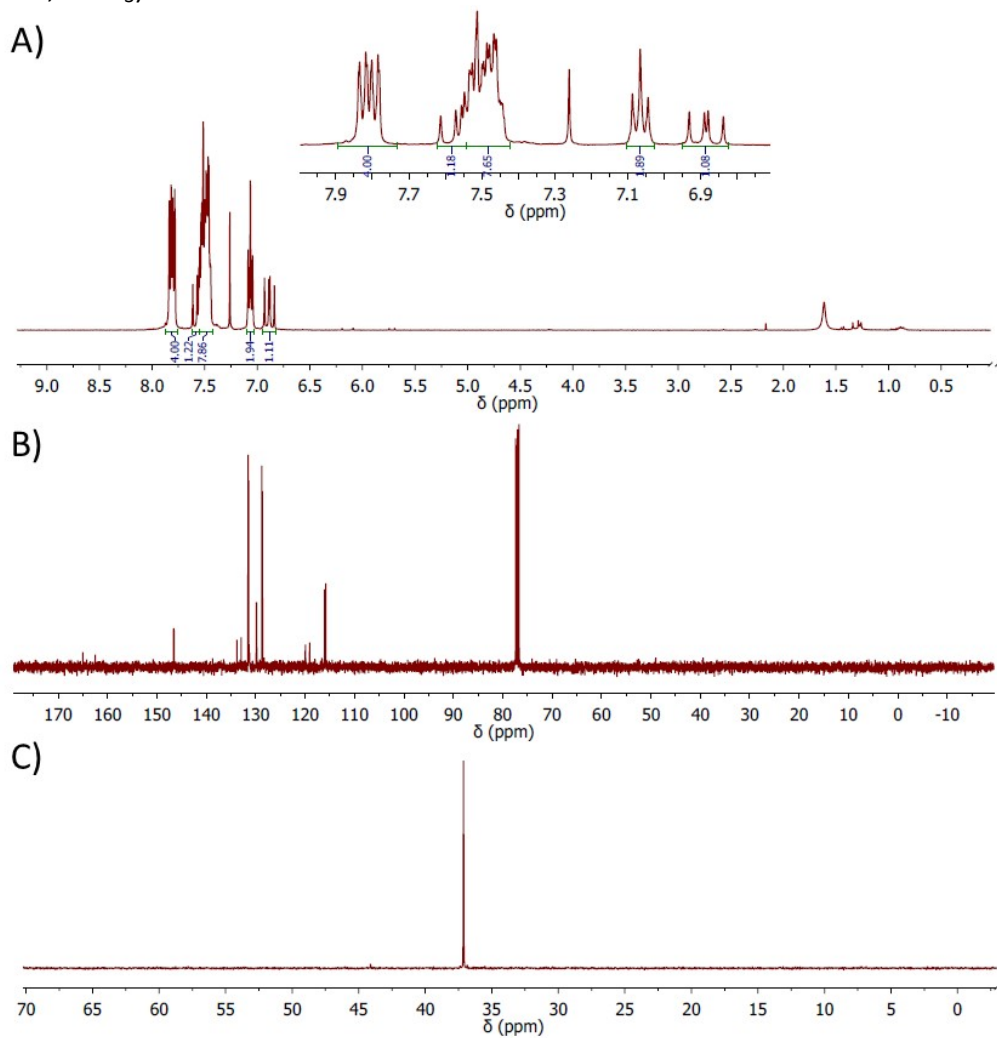

**Fig. S9** Panel **(A)** corresponding to  $^1\text{H}$ -NMR, **(B)** corresponding to  $^{13}\text{C}$ -NMR and **(C)** corresponding to  $^{31}\text{P}$ -NMR.

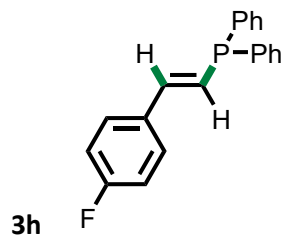

$\delta_{\text{H}}$  (500 MHz,  $\text{CDCl}_3$ ) 7.85 – 7.77 (4 H, m), 7.57 (1 H, dd,  $J$  19.1, 12.9), 7.54 – 7.42 (8 H, m), 7.09 – 7.03 (2 H, m), 6.94 – 6.84 (1 H, m).

$\delta_{\text{C}}$  (126 MHz,  $\text{CDCl}_3$ ) 164.76, 162.77, 146.63, 133.70, 133.00, 131.55, 131.25, 129.89, 128.69, 119.78, 119.09, 116.07, 115.89.

$\delta_{\text{P}}$  (202 MHz,  $\text{CDCl}_3$ ) 37.17

A)

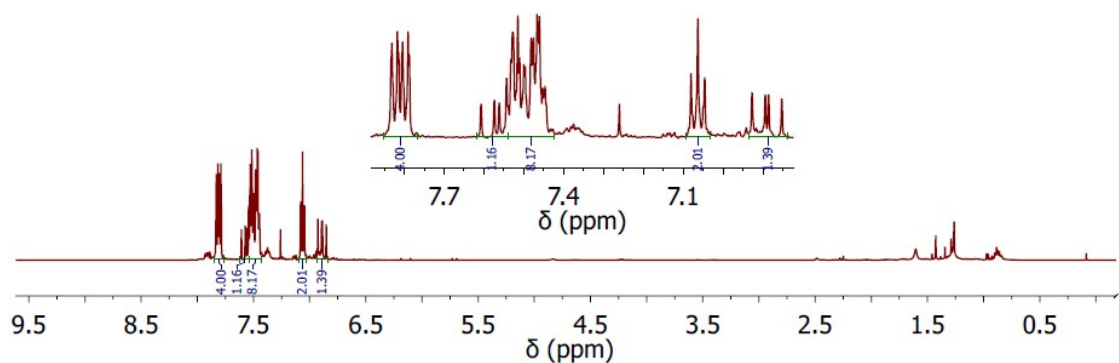

B)

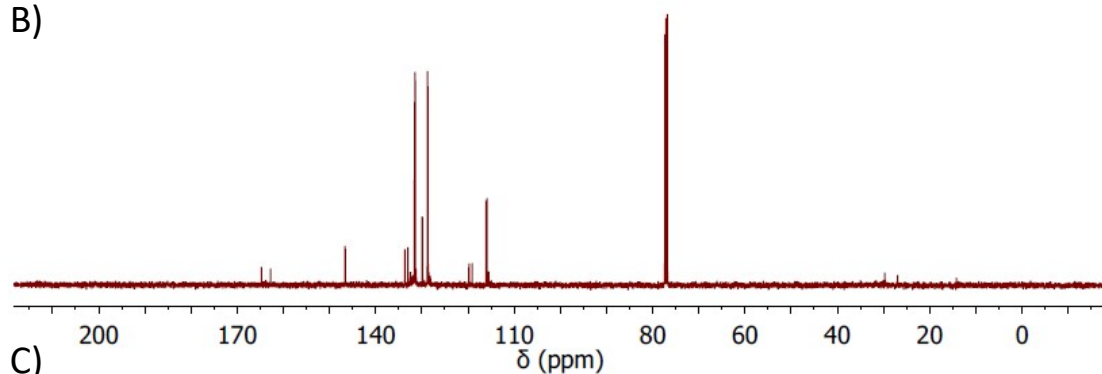

C)

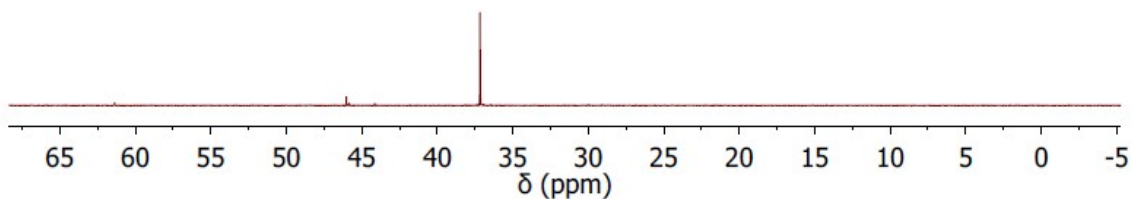

**Fig. S10** Panel (A) corresponding to  $^1\text{H}$ -NMR, (B) corresponding to  $^{13}\text{C}$ -NMR and (C) corresponding to  $^{31}\text{P}$ -NMR.

3i

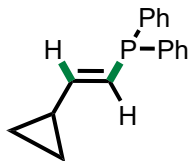

$\delta_{\text{H}}$  (500 MHz,  $\text{CDCl}_3$ ) 7.75 (4H, dd,  $J$  13.3, 7.1), 7.49 – 7.39 (6H, m), 6.49 – 6.23 (2H, m), 1.77 – 1.69 (1H, m), 0.96 – 0.90 (2H, m), 0.70 – 0.62 (2H, m).

$\delta_{\text{C}}$  (126 MHz,  $\text{CDCl}_3$ ) 157.25, 157.21, 134.35, 133.66, 132.34, 132.26, 131.38, 131.32, 131.29, 128.61, 128.51, 118.12, 117.42, 29.71, 16.45, 16.27, 8.68.

$\delta_{\text{P}}$  (202 MHz,  $\text{CDCl}_3$ ) 35.5

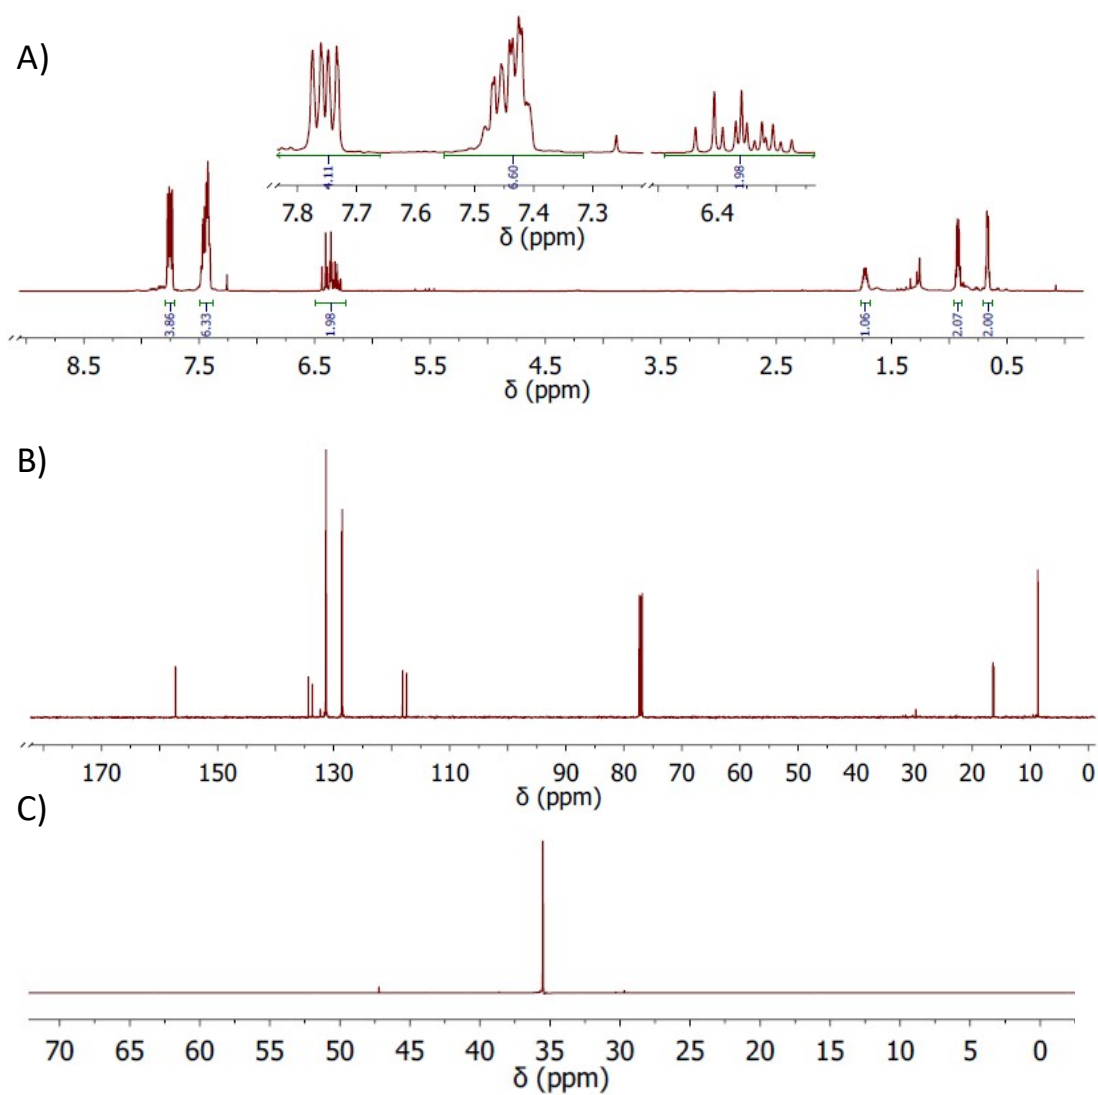

**Fig. S11** Panel (A) corresponding to  $^1\text{H-NMR}$ , (B) corresponding to  $^{13}\text{C-NMR}$  and (C) corresponding to  $^{31}\text{P-NMR}$ .

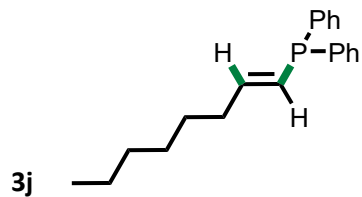

$\delta_{\text{H}}$  (400 MHz,  $\text{CDCl}_3$ ) 7.49 – 7.40 (6 H, m), 6.85 (1 H, ddt,  $J$  22.8, 16.2, 6.6), 6.41 – 6.27 (1 H, m), 2.33 (2 H, td,  $J$  7.0, 1.8), 1.54 – 1.44 (2 H, m), 1.28 (6 H, dd,  $J$  9.9, 7.4), 0.88 (3 H, t,  $J$  6.8).

$\delta_{\text{C}}$  (101 MHz,  $\text{CDCl}_3$ ) 152.99, 134.13, 133.28, 131.35, 128.54, 122.19, 121.35, 34.16, 31.54, 28.86, 27.96, 22.55, 14.03.

$\delta_{\text{P}}$  (162 MHz,  $\text{CDCl}_3$ ) 35.79

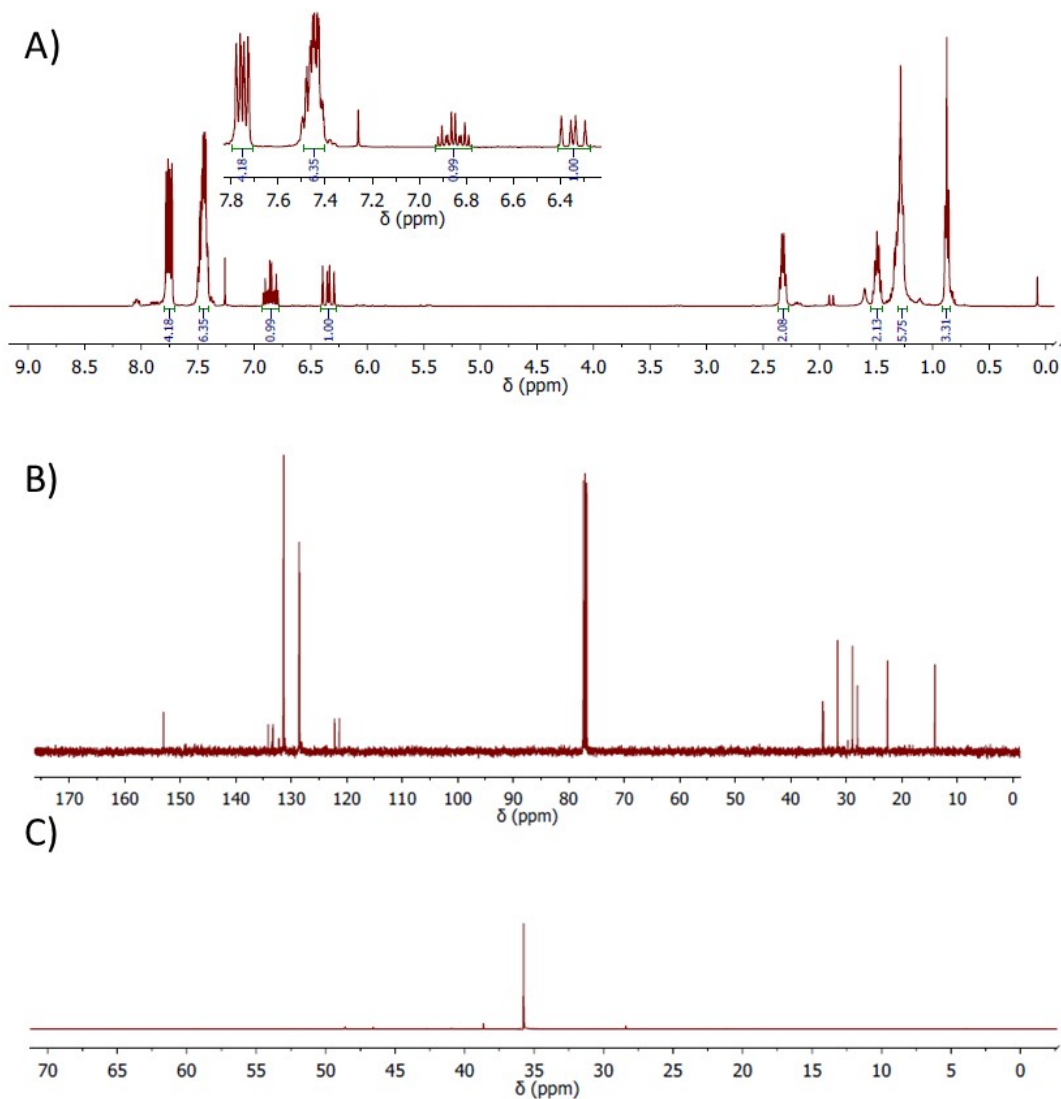

**Fig. S12** Panel (A) corresponding to  $^1\text{H-NMR}$ , (B) corresponding to  $^{13}\text{C-NMR}$  and (C) corresponding to  $^{31}\text{P-NMR}$ .

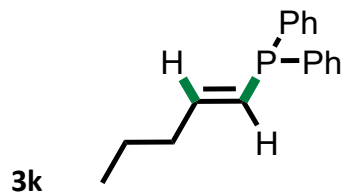

$\delta_{\text{H}}$  (400 MHz,  $\text{CDCl}_3$ ) 7.79 – 7.72 (4 H, m), 7.50 – 7.40 (7 H, m), 6.85 (1 H, ddt,  $J$  22.8, 16.2, 6.6), 6.35 (1 H, dd,  $J$  24.2, 16.2), 2.31 (2 H, td,  $J$  7.1, 1.8), 1.52 (2 H, dt,  $J$  13.9, 7.0), 0.94 (3 H, t,  $J$  7.4).

$\delta_{\text{C}}$  (101 MHz,  $\text{CDCl}_3$ ) 152.75, 134.13, 133.36, 131.37, 128.55, 122.43, 121.58, 36.15, 21.30, 13.72.

$\delta_{\text{P}}$  (162 MHz,  $\text{CDCl}_3$ ) 35.74

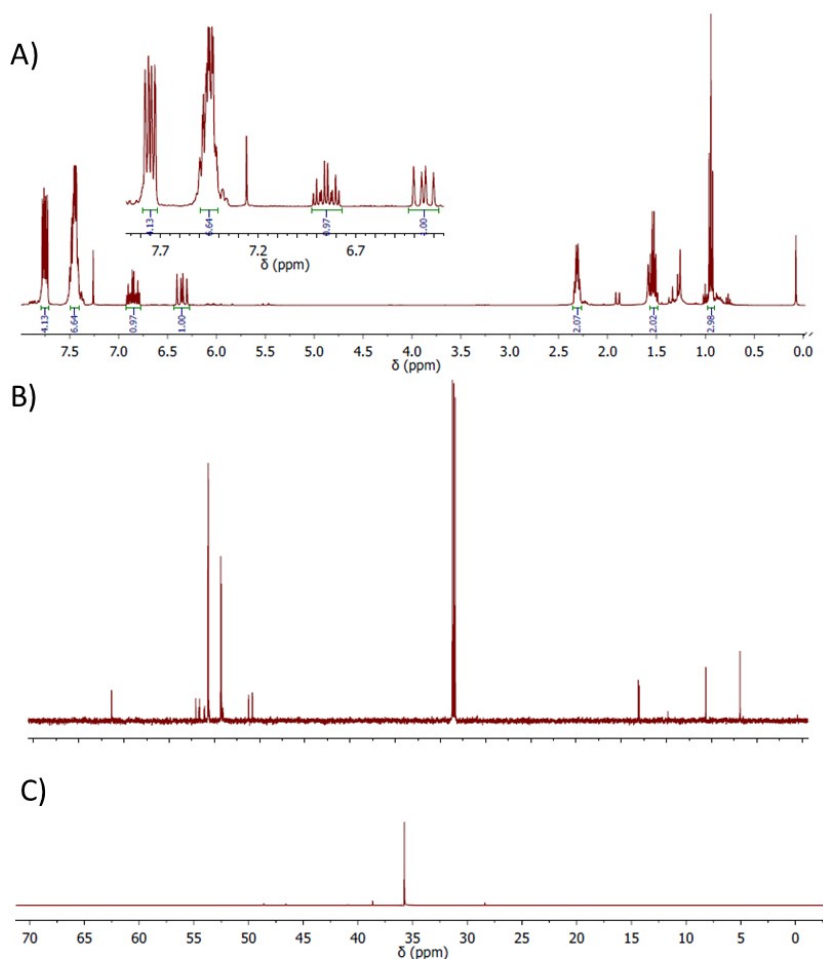

**Fig. S13** Panel **(A)** corresponding to  $^1\text{H-NMR}$ , **(B)** corresponding to  $^{13}\text{C-NMR}$  and **(C)** corresponding to  $^{31}\text{P-NMR}$ .

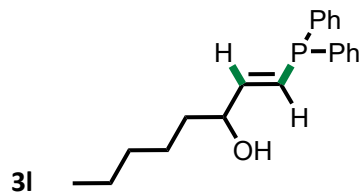

$\delta_{\text{H}}$  (400 MHz,  $\text{CDCl}_3$ ) 7.74 (4 H, dd,  $J$  11.7, 6.0), 7.54 – 7.36 (6 H, m), 7.01 – 6.83 (1 H, m), 6.67 (1 H, dd,  $J$  23.5, 16.3), 4.39 (1 H, s), 1.85 (2 H, s), 1.49 – 1.35 (3 H, m), 1.25 (3 H, s), 0.87 (5 H, d,  $J$  5.9).

$\delta_{\text{C}}$  (126 MHz,  $\text{CDCl}_3$ ) 154.08, 131.45, 128.64, 121.07, 120.40, 72.27, 36.64, 31.61, 72, 25.01, 22.56, 14.01.

$\delta_{\text{P}}$  (202 MHz,  $\text{CDCl}_3$ ) 36.03

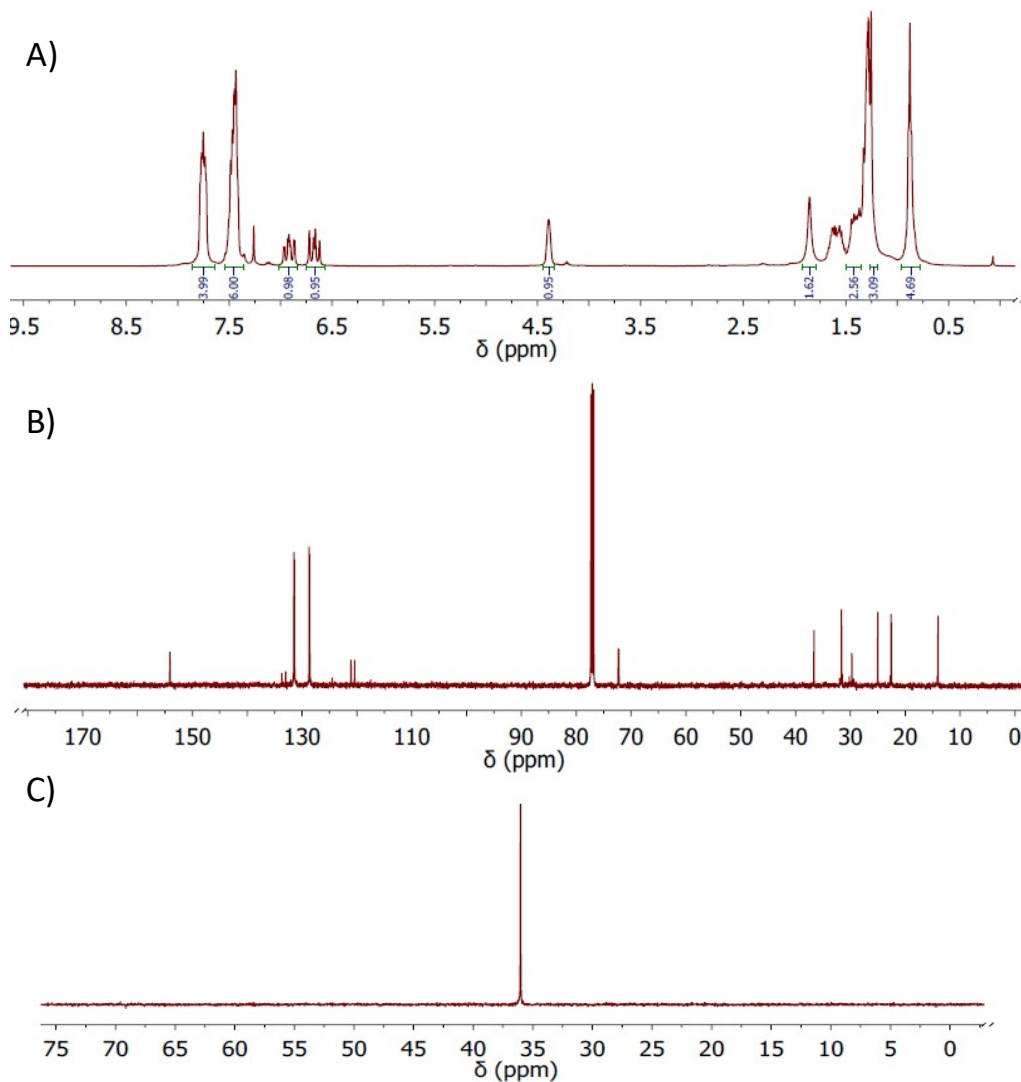

**Fig. S14** Panel **(A)** corresponding to  $^1\text{H-NMR}$ , **(B)** corresponding to  $^{13}\text{C-NMR}$  and **(C)** corresponding to  $^{31}\text{P-NMR}$ .



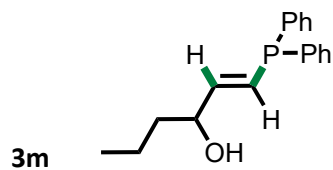

$\delta_{\text{H}}$  (500 MHz,  $\text{CDCl}_3$ ) 7.82 – 7.70 (4 H, m), 7.51 – 7.39 (6 H, m), 6.91 (1 H, ddd,  $J$  22.8, 16.2, 3.9), 6.74 – 6.60 (1 H, m), 4.40 (1 H, d,  $J$  2.8), 1.89 (1 H, s), 1.64 – 1.52 (2 H, m), 1.48 – 1.37 (2 H, m), 0.93 (3 H, t,  $J$  7.3).

$\delta_{\text{C}}$  (126 MHz,  $\text{CDCl}_3$ ) 154.12, 133.65, 132.96, 131.44, 128.65, 120.55, 72.05, 71.91, 38.76, 18.59, 13.93.

$\delta_{\text{P}}$  (202 MHz,  $\text{CDCl}_3$ ) 36.04

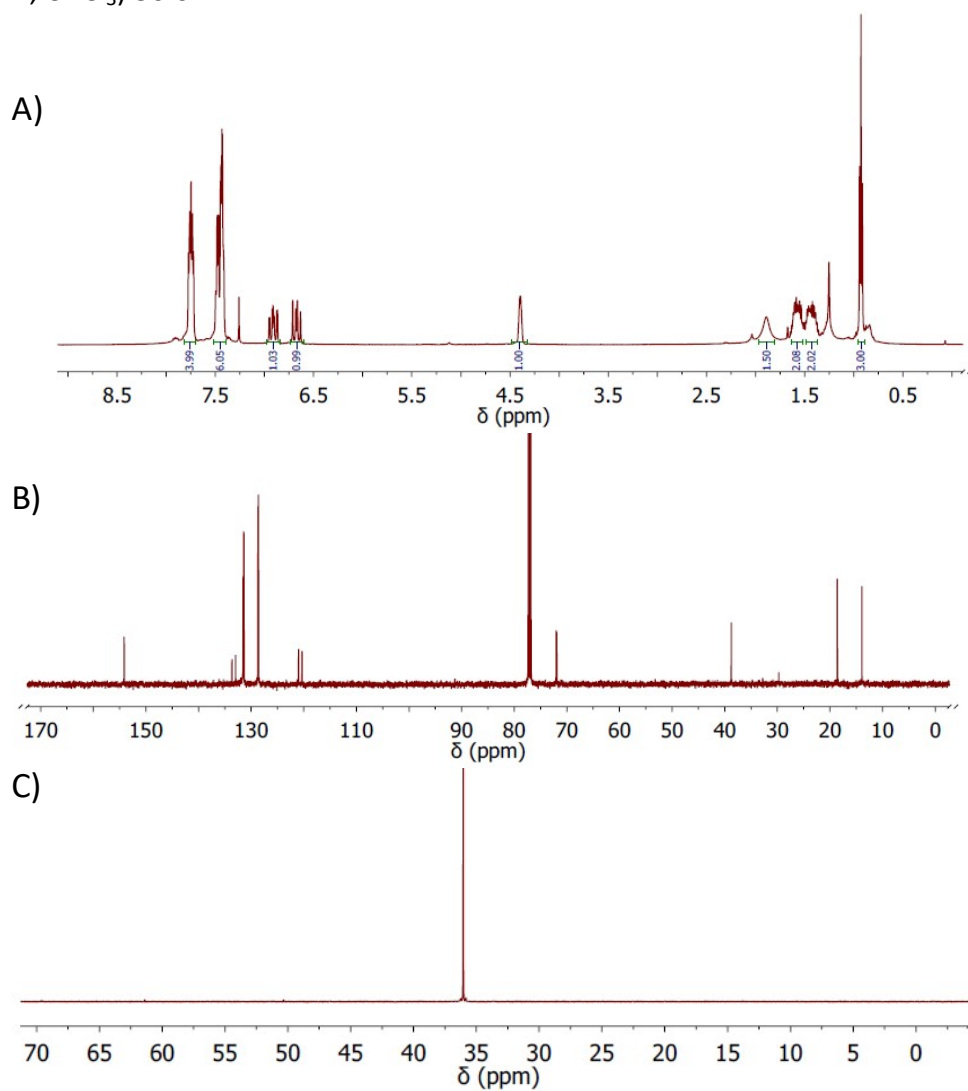

**Fig. S15** Panel **(A)** corresponding to  $^1\text{H-NMR}$ , **(B)** corresponding to  $^{13}\text{C-NMR}$  and **(C)** corresponding to  $^{31}\text{P-NMR}$ .

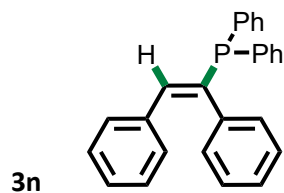

$\delta_{\text{H}}$  (500 MHz,  $\text{CDCl}_3$ ) 7.80 (4H, ddd,  $J$  18.2, 9.7, 8.5), 7.68 (1H, d,  $J$  24.0), 7.49 (2H, dd,  $J$  7.5, 5.7), 7.41 (4H, tt,  $J$  12.1, 6.0), 7.26 – 7.20 (1H, m), 7.19 – 7.10 (5H, m), 7.02 (2H, d,  $J$  7.6), 6.96 – 6.90 (2H, m).

$\delta_{\text{C}}$  (126 MHz,  $\text{CDCl}_3$ ) 144.04, 143.93, 135.62, 135.38, 135.00, 134.79, 132.69, 131.54, 130.94, 130.28, 129.06, 128.62, 128.39, 128.29, 127.93.

$\delta_{\text{P}}$  (202 MHz,  $\text{CDCl}_3$ ) 48.09

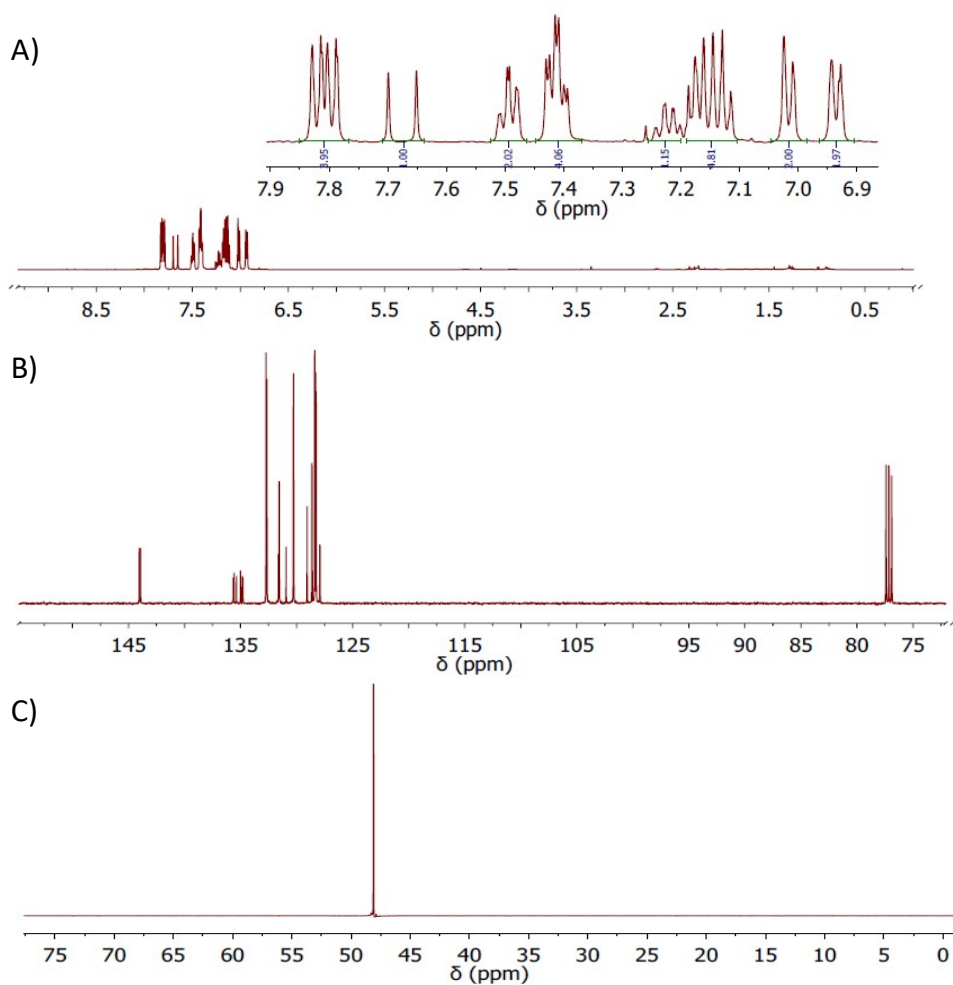

**Fig. S16** Panel **(A)** corresponding to  $^1\text{H}$ -NMR, **(B)** corresponding to  $^{13}\text{C}$ -NMR and **(C)** corresponding to  $^{31}\text{P}$ -NMR.

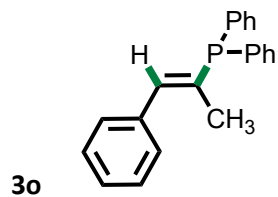

$\delta_{\text{H}}$  (500 MHz,  $\text{CDCl}_3$ ) 7.91–7.85 (4 H, m), 7.56 (2 H, dd,  $J$  7.2, 1.7), 7.54 – 7.49 (4 H, m), 7.37 (5 H, dt,  $J$  26.2, 7.6), 7.04 (1 H, d,  $J$  24.1), 2.20 (3 H, dd,  $J$  15.0, 1.2).

$\delta_{\text{C}}$  (126 MHz,  $\text{CDCl}_3$ ) 142.29, 142.20, 132.40, 132.31, 131.65, 129.36, 128.69, 128.59, 128.40, 128.34., 15.37.

$\delta_{\text{P}}$  (202 MHz,  $\text{CDCl}_3$ ) 50.55

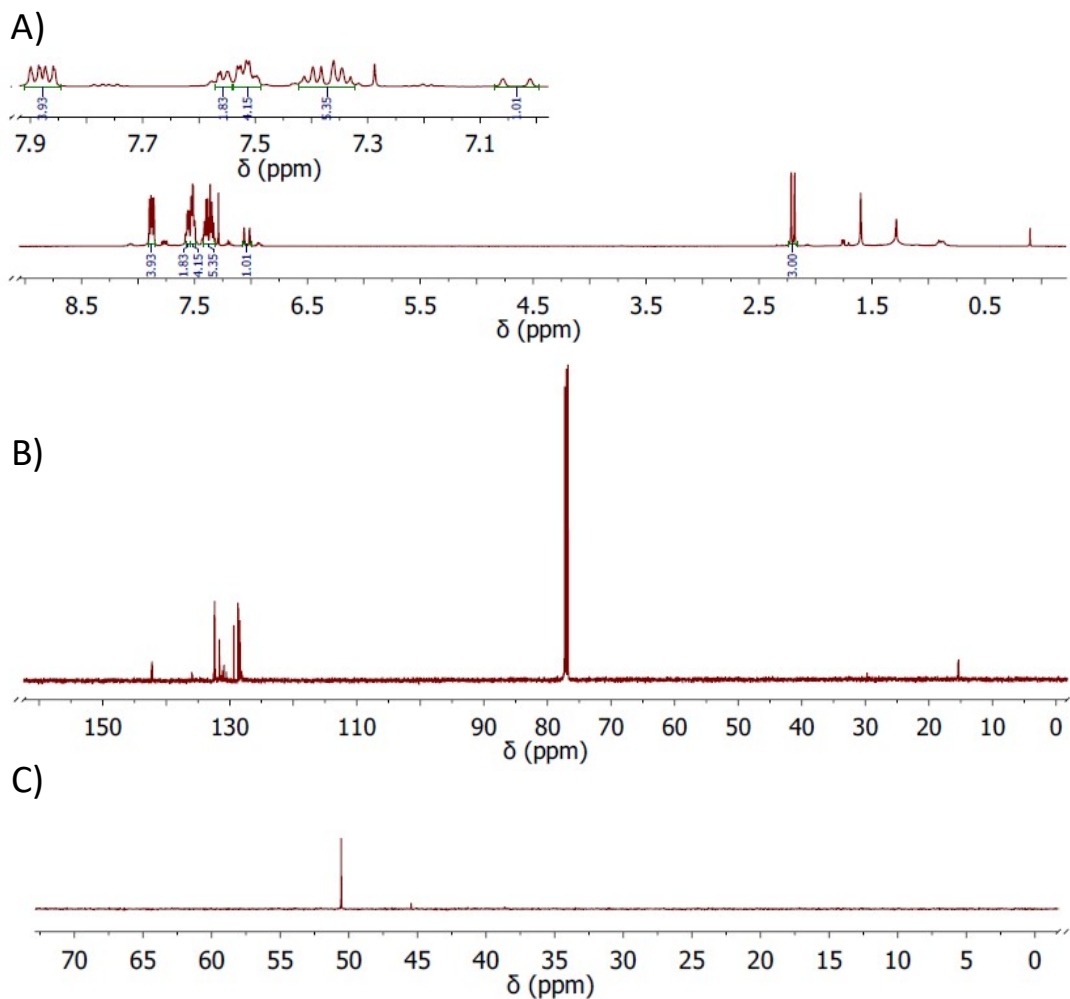

**Fig. S17** Panel **(A)** corresponding to  $^1\text{H}$ -NMR, **(B)** corresponding to  $^{13}\text{C}$ -NMR and **(C)** corresponding to  $^{31}\text{P}$ -NMR.

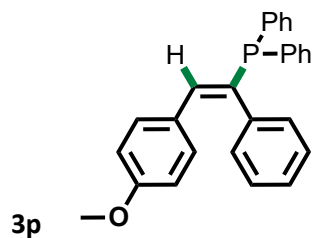

$\delta_{\text{H}}$  (500 MHz,  $\text{CDCl}_3$ ),  $\delta_{\text{C}}$  (126 MHz,  $\text{CDCl}_3$ ), and  $\delta_{\text{P}}$  (202 MHz,  $\text{CDCl}_3$ ) 48.11 and 69.57 ppm

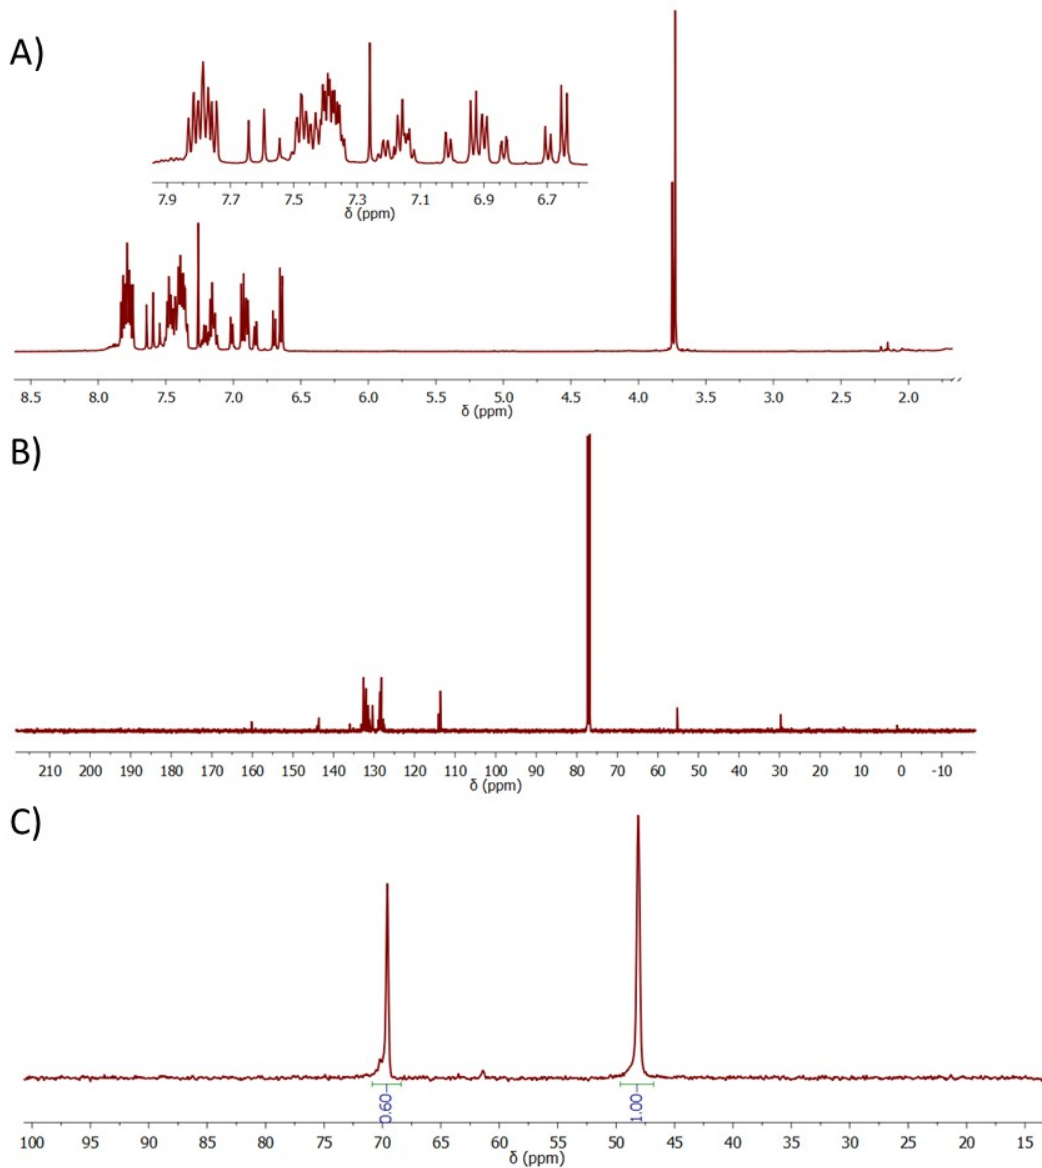

**Fig. S18** Panel **(A)** corresponding to  $^1\text{H}$ -NMR, **(B)** corresponding to  $^{13}\text{C}$ -NMR and **(C)** corresponding to  $^{31}\text{P}$ -NMR.

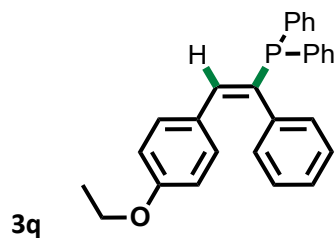

$\delta_{\text{H}}$  (500 MHz,  $\text{CDCl}_3$ ),  $\delta_{\text{C}}$  (126 MHz,  $\text{CDCl}_3$ ), and  $\delta_{\text{P}}$  (202 MHz,  $\text{CDCl}_3$ ) 48.09 and 61.37 ppm

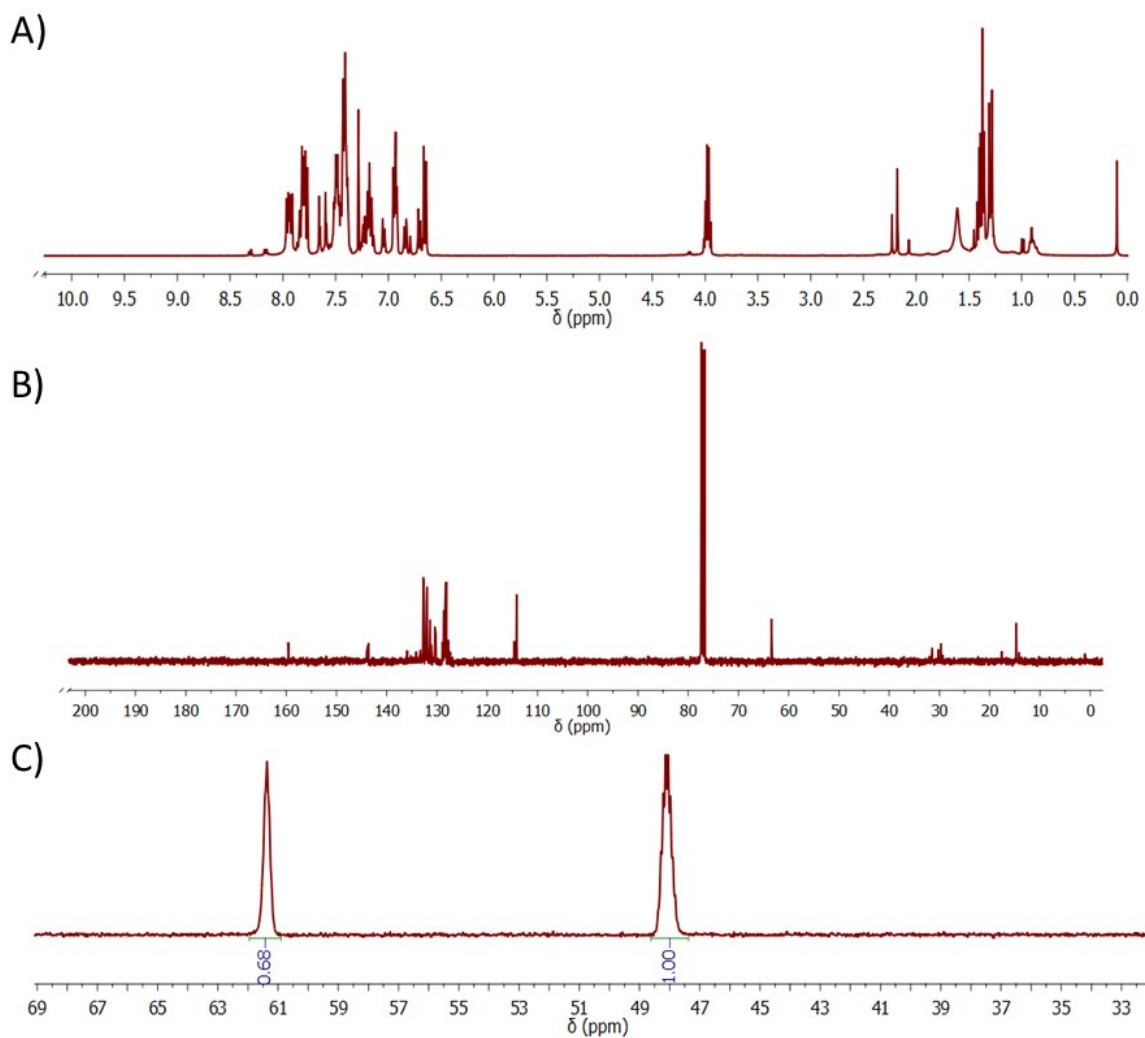

**Fig. S19** Panel **(A)** corresponding to  $^1\text{H}$ -NMR, **(B)** corresponding to  $^{13}\text{C}$ -NMR and **(C)** corresponding to  $^{31}\text{P}$ -NMR.

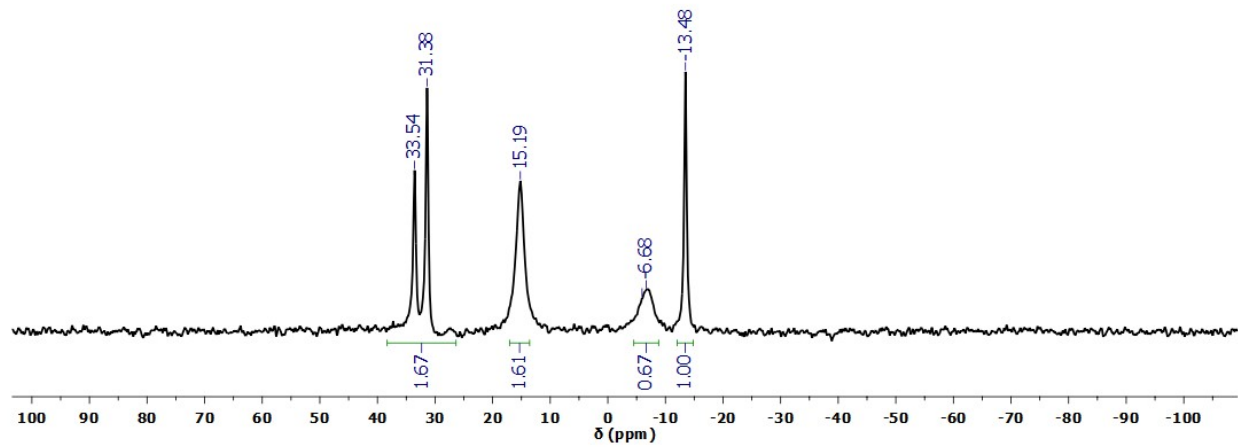

**Fig. S20**  $^{31}\text{P}$ -NMR spectrum of **2** measured at  $-40\text{ }^\circ\text{C}$  in  $\text{d}^8\text{-THF}$  solvent with the integration value.

**Table S5** Selected bond distances and spin densities on the important atoms of the DFT optimized structures of the ground state  $^1R$  ( $S = 0$ ) and 1st and 2nd excited  $S = 1$ ,  $S = 2$  states respectively. The Wiberg-bond indices and the natural charges of selected bonds and atoms are tabulated for the  $S = 0$  spin state.

| <i>bonds</i>   | $^1R$ ( $S = 0$ ,<br>GS) | $^3R$ ( $S = 1$ ,<br>1st-ES) | $^5R$ ( $S = 2$ ,<br>2nd-ES) | $^1R$ ( $S = 0$ ,<br>GS) | Atom<br>number | $^1R$ ( $S = 0$ ,<br>GS) | $^1R$ ( $S = 0$ ,<br>GS) | $^3R$ ( $S = 1$ ,<br>ES) | $^5R$ ( $S = 2$ ,<br>2nd-ES) |
|----------------|--------------------------|------------------------------|------------------------------|--------------------------|----------------|--------------------------|--------------------------|--------------------------|------------------------------|
|                | Bond<br>Length(Å)        | Bond<br>Length(Å)            | Bond<br>Length(Å)            | WB-indices               |                | Spin<br>density          | NPA<br>charges           | Spin<br>density          | Spin<br>density              |
| <b>Co1-N1</b>  | 1.868                    | 1.870                        | 1.997                        | 0.42                     | <b>Co1</b>     | 0.841                    | 0.849                    | 1.044                    | 2.573                        |
| <b>Co1-N2</b>  | 2.024                    | 2.009                        | 2.072                        | 0.30                     | <b>Co2</b>     | 0.142                    | 0.198                    | -0.187                   | -0.035                       |
| <b>Co1-N3</b>  | 2.030                    | 2.016                        | 2.062                        | 0.29                     | <b>N1</b>      | -0.168                   | -0.499                   | 0.162                    | 0.264                        |
| <b>Co2-C9</b>  | 2.120                    | 2.127                        | 2.118                        | 0.36                     | <b>N2</b>      | -0.181                   | -0.665                   | 0.169                    | 0.263                        |
| <b>Co2-C10</b> | 1.942                    | 1.994                        | 1.945                        | --                       | <b>N3</b>      | -0.177                   | -0.674                   | 0.186                    | 0.272                        |
| <b>Co2-C11</b> | 2.122                    | 2.129                        | 2.127                        | 0.35                     | <b>C7</b>      | -0.198                   | 0.081                    | 0.221                    | 0.201                        |
| <b>N1-C8</b>   | 1.371                    | 1.368                        | 1.363                        | 1.20                     | <b>C8</b>      | 0.046                    | 0.077                    | -0.045                   | -0.014                       |
| <b>N1-C12</b>  | 1.368                    | 1.368                        | 1.360                        | 1.21                     | <b>C12</b>     | 0.019                    | 0.087                    | -0.045                   | 0.008                        |
| <b>N3-C7</b>   | 1.395                    | 1.397                        | 1.402                        | 1.25                     | <b>C13</b>     | -0.170                   | 0.083                    | 0.210                    | 0.180                        |
| <b>N2-C13</b>  | 1.391                    | 1.395                        | 1.397                        | 1.25                     | <b>C9</b>      | -0.067                   | -0.409                   | -0.045                   | 0.033                        |
| <b>C7-C8</b>   | 1.408                    | 1.412                        | 1.415                        | 1.32                     | <b>C10</b>     | 0.006                    | -0.371                   | 0.162                    | 0.006                        |
| <b>C8-C9</b>   | 1.463                    | 1.461                        | 1.467                        | 1.12                     | <b>C11</b>     | -0.065                   | -0.409                   | -0.045                   | 0.031                        |
| <b>C9-C10</b>  | 1.453                    | 1.451                        | 1.453                        | 1.22                     | --             | --                       |                          | --                       |                              |
| <b>C10-C11</b> | 1.451                    | 1.450                        | 1.451                        | 1.22                     | --             | --                       |                          |                          | --                           |
| <b>C11-C12</b> | 1.460                    | 1.458                        | 1.463                        | 1.12                     | --             | --                       |                          |                          | --                           |
| <b>C12-C13</b> | 1.406                    | 1.395                        | 1.413                        | 1.31                     | --             | --                       |                          |                          | --                           |

**Table S6** Turn Over Number (TON) calculated for the hydrophosphination product formed after catalytic reaction with **2**, and the literature comparison of E-selective product.

| Substrate        | Catalyst                                    | Cat. Loading (mole%) | Time(hr)/Temp.(°C)/Additive | Selectivity (di/E/Z) | TON E-selective/Overall |
|------------------|---------------------------------------------|----------------------|-----------------------------|----------------------|-------------------------|
| Phenyl Acetylene | <sup>1</sup> Rh(I)                          | 5                    | 2/110/Ag(OTf)-MeOH          | 0/96/4               | 17.1/17.8               |
| Phenyl Acetylene | <sup>2</sup> Rh(I)-NHC                      | 5                    | 24/120/-                    | 66/4/6               | 0.71/18.0               |
| Phenyl Acetylene | <sup>3</sup> Eu <sub>2</sub> -Complex       | 1                    | 2/60/-                      | 0/22/78              | 22/100                  |
| Phenyl Acetylene | <sup>4</sup> CuCl <sub>2</sub> <sup>d</sup> | 1.25                 | 8/110/ <sup>t</sup> Bu      | 95/0/0               | 0/76.8                  |
| Phenyl Acetylene | <sup>5</sup> CpFe(CO) <sup>e</sup>          | 5.56                 | 2/110/-                     | 96/0/0               | 0/19.2                  |
| Phenyl Acetylene | Complex <b>2</b>                            | 2                    | 1/60/-                      | 0/100/0              | 44.5/50                 |

**Table S7** Table for Crystallographic parameters of the catalytic hydrophosphination product formed.

| Substrate                              | PhAc ( <b>3a</b> )                                            | 4-Me-PhAc ( <b>3b</b> )                                       | 4-OMe-PhAc ( <b>3c</b> )                                                     | 4-OEt-PhAc ( <b>3d</b> )                                                     | 4-Br-PhAc ( <b>3g</b> )                                                       | 4-F-PhAc ( <b>3h</b> )                                                       | CyclopropylAc ( <b>3i</b> )                                   |
|----------------------------------------|---------------------------------------------------------------|---------------------------------------------------------------|------------------------------------------------------------------------------|------------------------------------------------------------------------------|-------------------------------------------------------------------------------|------------------------------------------------------------------------------|---------------------------------------------------------------|
| Formula                                | C <sub>20</sub> H <sub>17</sub> P <sub>1</sub> S <sub>1</sub> | C <sub>21</sub> H <sub>19</sub> P <sub>1</sub> S <sub>1</sub> | C <sub>21</sub> H <sub>19</sub> O <sub>1</sub> P <sub>1</sub> S <sub>1</sub> | C <sub>22</sub> H <sub>21</sub> O <sub>1</sub> P <sub>1</sub> S <sub>1</sub> | C <sub>20</sub> H <sub>16</sub> Br <sub>1</sub> P <sub>1</sub> S <sub>1</sub> | C <sub>20</sub> H <sub>16</sub> F <sub>1</sub> P <sub>1</sub> S <sub>1</sub> | C <sub>17</sub> H <sub>17</sub> P <sub>1</sub> S <sub>1</sub> |
| System                                 | Monoclinic                                                    | Monoclinic                                                    | Monoclinic                                                                   | Triclinic                                                                    | Monoclinic                                                                    | Monoclinic                                                                   | Monoclinic                                                    |
| Space Group                            | P2 <sub>1</sub> /c                                            | P2 <sub>1</sub> /c                                            | P2 <sub>1</sub> /c                                                           | P-1                                                                          | P2 <sub>1</sub> /c                                                            | P2 <sub>1</sub> /n                                                           | P2 <sub>1</sub> /c                                            |
| a [Å]                                  | 10.647(4)                                                     | 10.5583(2)                                                    | 10.9751(11)                                                                  | 9.5625(6)                                                                    | 10.9046(5)                                                                    | 13.6620(7)                                                                   | 9.4336(2)                                                     |
| b [Å]                                  | 9.422(3)                                                      | 9.7547(2)                                                     | 9.3003(9)                                                                    | 11.2770(6)                                                                   | 9.5387(6)                                                                     | 9.0092(3)                                                                    | 9.2923(2)                                                     |
| c [Å]                                  | 17.618(8)                                                     | 17.5966(3)                                                    | 17.8484(16)                                                                  | 19.3935(11)                                                                  | 17.5064(10)                                                                   | 14.2277(6)                                                                   | 16.9938(4)                                                    |
| α [°]                                  | 90.0                                                          | 90.0                                                          | 90.0                                                                         | 102.271(5)                                                                   | 90.0                                                                          | 90.0                                                                         | 90.0                                                          |
| β [°]                                  | 107.46(4)                                                     | 97.406(2)                                                     | 96.874(8)                                                                    | 100.184(5)                                                                   | 97.019(5)                                                                     | 97.679(4)                                                                    | 94.068(2)                                                     |
| γ [°]                                  | 90.0                                                          | 90.0                                                          | 90.0                                                                         | 98.545(5)                                                                    | 90.0                                                                          | 90.0                                                                         | 90.0                                                          |
| V [Å <sup>3</sup> ]                    | 1685.9(12)                                                    | 1797.21(6)                                                    | 1808.7(3)                                                                    | 1973.3(2)                                                                    | 1807.29(18)                                                                   | 1735.49(13)                                                                  | 1485.92(6)                                                    |
| Z                                      | 4                                                             | 4                                                             | 4                                                                            | 2                                                                            | 4                                                                             | 4                                                                            | 4                                                             |
| ρ <sub>cal.</sub> [g/cm <sup>3</sup> ] | 1.262                                                         | 1.236                                                         | 1.287                                                                        | 1.227                                                                        | 1.467                                                                         | 1.295                                                                        | 1.271                                                         |
| 2θ                                     | 49.998                                                        | 129.998                                                       | 49.998                                                                       | 49.998                                                                       | 129.998                                                                       | 129.998                                                                      | 48.998                                                        |



| Radiation     | Mo K $\alpha$ | Cu K $\alpha$ | Mo K $\alpha$ | Mo K $\alpha$ | Cu K $\alpha$ | Cu K $\alpha$ | Mo K $\alpha$ |
|---------------|---------------|---------------|---------------|---------------|---------------|---------------|---------------|
| $\lambda$ [Å] | 0.71073       | 1.54184       | 0.71073       | 0.71073       | 1.54184       | 1.54184       | 0.71073       |
| T [K]         | 150           | 150           | 150           | 150           | 150           | 150           | 150           |
| R1 (%)        | 8.9           | 4.61          | 6.48          | 8.13          | 7.3           | 7.73          | 2.95          |
| wR2 (%)       | 27.25         | 12.99         | 14.10         | 22.38         | 22.35         | 24.57         | 7.35          |

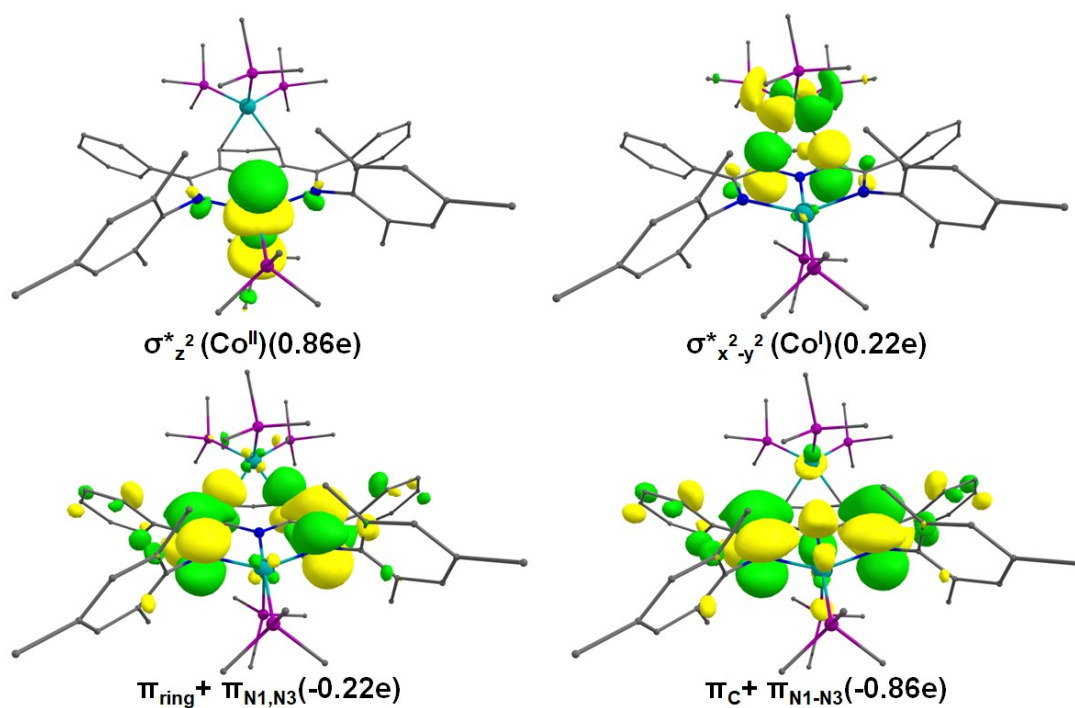

Fig. S21 Spin natural orbital analysis of the singlet ground state.

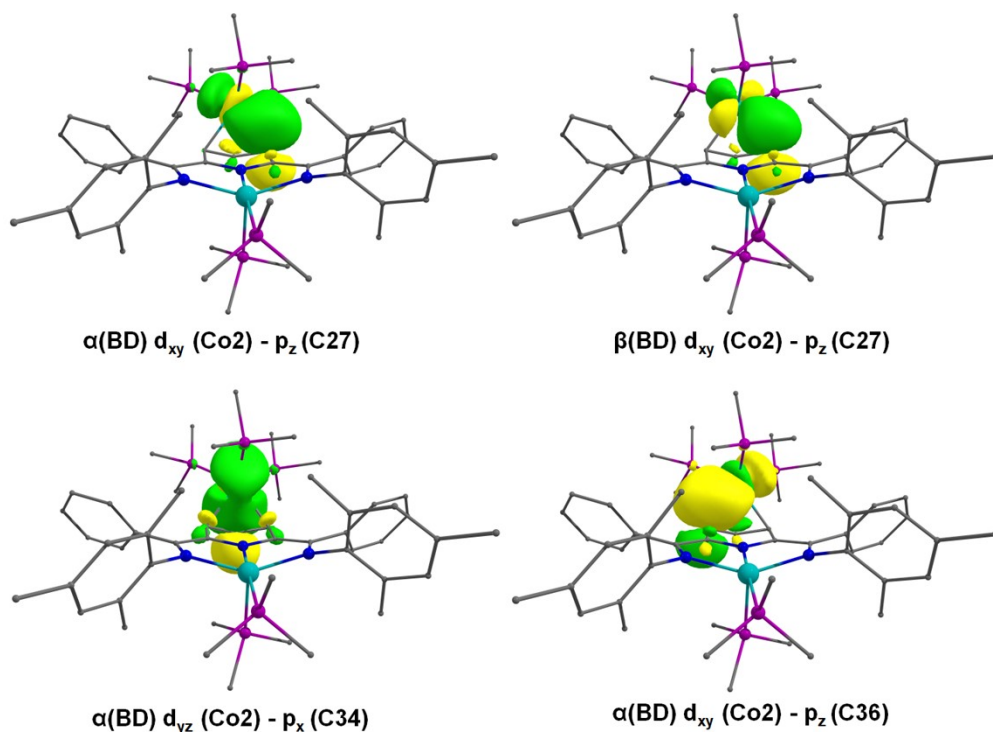

Fig. S22 Orbitals involved in the  $\eta^3$ -bonding between Co<sup>I</sup> and p-allylic moiety.

#### Reaction coordinates.

| <sup>5</sup> R |              |              |              | <sup>3</sup> R |              |              |              |
|----------------|--------------|--------------|--------------|----------------|--------------|--------------|--------------|
| Co             | -1.864652000 | 0.167236000  | 0.401459000  | Co             | -1.731127698 | -0.242066312 | -0.264707160 |
| Co             | 3.394053000  | -0.295933000 | -0.005356000 | Co             | 3.340201192  | 0.487192326  | 0.012622994  |
| P              | -1.843313000 | 0.079430000  | 3.047079000  | P              | -1.906975943 | -0.159296640 | -3.076841846 |
| P              | -4.294468000 | 0.425444000  | 0.053978000  | P              | -3.999442801 | -0.655769676 | -0.104836363 |
| P              | 2.542512000  | -0.043523000 | -2.048832000 | P              | 2.513604633  | 0.171789456  | 2.044766291  |
| P              | 5.005596000  | 1.230631000  | 0.071398000  | P              | 5.017318943  | -0.955000889 | -0.095799074 |
| P              | 4.574872000  | -2.154751000 | -0.293414000 | P              | 4.403308760  | 2.406782797  | 0.298908415  |
| N              | -1.538730000 | -1.868053000 | 0.030659000  | N              | -1.675573083 | 1.745629271  | 0.022954122  |
| N              | 0.121167000  | -0.039528000 | 0.712416000  | N              | 0.066495355  | 0.055469947  | -0.685561297 |
| N              | -1.153261000 | 2.095820000  | 0.117948000  | N              | -1.059498579 | -2.134596245 | -0.092187439 |
| C              | -0.287397000 | -2.296145000 | 0.407394000  | C              | -0.450375348 | 2.283487673  | -0.370610345 |
| C              | -0.047522000 | -4.404253000 | -0.938985000 | C              | -0.382381363 | 4.396592972  | 0.982956794  |
| H              | -0.532560000 | -3.902868000 | -1.768816000 | H              | -0.840736175 | 3.858945712  | 1.812266975  |
| C              | 0.141600000  | -3.705730000 | 0.269653000  | C              | -0.131253950 | 3.714947057  | -0.226095742 |
| C              | 0.861716000  | 1.085407000  | 0.868213000  | C              | 0.877235647  | -1.027293381 | -0.891373675 |
| C              | -2.562928000 | -2.751056000 | -0.369286000 | C              | -2.763981144 | 2.570907121  | 0.380971106  |
| C              | -4.771720000 | -4.344857000 | -1.201638000 | C              | -5.056873355 | 4.079572936  | 1.144209802  |
| C              | 0.154280000  | 2.268242000  | 0.532167000  | C              | 0.253233539  | -2.248194725 | -0.554968290 |
| C              | 0.638735000  | -1.285964000 | 0.780428000  | C              | 0.522166709  | 1.343450858  | -0.758227917 |
| C              | 0.766084000  | -4.389975000 | 1.331870000  | C              | 0.459874609  | 4.443411400  | -1.280581425 |
| H              | 0.885125000  | -3.884074000 | 2.285645000  | H              | 0.625584877  | 3.947438436  | -2.238689644 |
| C              | 0.397189000  | -5.716397000 | -1.087271000 | C              | -0.032503125 | 5.738302307  | 1.137777653  |
| H              | 0.248820000  | -6.227965000 | -2.034971000 | H              | -0.229823796 | 6.239587682  | 2.089164791  |
| C              | -4.258674000 | -4.432347000 | 0.095636000  |                |              |              |              |
| H              | -4.727993000 | -5.112867000 | 0.804628000  |                |              |              |              |
| C              | -1.901802000 | 3.122860000  | -0.498606000 |                |              |              |              |

|   |              |              |              |   |              |              |              |
|---|--------------|--------------|--------------|---|--------------|--------------|--------------|
| C | 2.262286000  | 0.944658000  | 1.274776000  | C | -4.519557360 | 4.173870205  | -0.144349499 |
| H | 2.744633000  | 1.842213000  | 1.640611000  | H | -5.007049730 | 4.825298512  | -0.877147803 |
| C | -3.075825000 | -2.649691000 | -1.686428000 | C | -1.725313627 | -3.211971490 | 0.540910167  |
| C | -3.183786000 | -3.652242000 | 0.531112000  | C | 2.261532109  | -0.796163576 | -1.296161991 |
| C | -3.035997000 | 3.986878000  | -2.474231000 | H | 2.783696172  | -1.660935511 | -1.674851285 |
| H | -3.255664000 | 3.894846000  | -3.537587000 | C | -3.287892550 | 2.476405060  | 1.696453888  |
| C | -2.203756000 | 3.030101000  | -1.878114000 | C | -3.399279599 | 3.435486435  | -0.545975452 |
| C | 2.698334000  | -0.325096000 | 1.801803000  | C | -2.750406160 | -4.150848349 | 2.548397508  |
| H | 3.397878000  | -0.428485000 | 2.628229000  | C | -2.975105404 | -4.056228282 | 3.616340169  |
| C | 2.039970000  | -1.438460000 | 1.168655000  | H | -2.026498034 | -3.123909517 | 1.924491710  |
| H | 2.354424000  | -2.436736000 | 1.443346000  | C | 2.641763425  | 0.510241170  | -1.801616224 |
| C | 1.215525000  | -5.701655000 | 1.181577000  | H | 3.285645135  | 0.664437600  | -2.659794611 |
| H | 1.696647000  | -6.204015000 | 2.017226000  | C | 1.911568144  | 1.570894943  | -1.135957283 |
| C | 0.835780000  | 3.585496000  | 0.539110000  | H | 2.158361596  | 2.588985403  | -1.390838151 |
| C | -4.166686000 | -3.433921000 | -2.072279000 | C | 0.816240560  | 5.783809963  | -1.122125648 |
| H | -4.545149000 | -3.339072000 | -3.089223000 | H | 1.275851110  | 6.323161703  | -1.954919931 |
| C | -3.265970000 | 5.136422000  | -0.393498000 | C | 0.997739361  | -3.522664683 | -0.590855503 |
| H | -3.687488000 | 5.948744000  | 0.196870000  | C | -4.423537619 | 3.214940175  | 2.047027465  |
| C | 1.037045000  | -6.371987000 | -0.031240000 | H | -4.817690001 | 3.123659216  | 3.064564405  |
| H | 1.385431000  | -7.394366000 | -0.150132000 | C | -2.855952150 | -5.374109824 | 0.498960699  |
| C | 1.502482000  | 4.040582000  | 1.695969000  | H | -3.183526097 | -6.249775931 | -0.071345264 |
| H | 1.470201000  | 3.432985000  | 2.595489000  | C | 0.574670088  | 6.439629382  | 0.089989766  |
| C | -3.573693000 | 5.055231000  | -1.757059000 | H | 0.850977872  | 7.489611767  | 0.214797279  |
| C | -5.921202000 | -5.216422000 | -1.650683000 | C | 1.664875235  | -3.924653122 | -1.768599797 |
| H | -5.564818000 | -6.176238000 | -2.049727000 | H | 1.579500424  | -3.304393355 | -2.662732074 |
| H | -6.506076000 | -4.734415000 | -2.442381000 | C | -3.176005959 | -5.289719811 | 1.860141640  |
| H | -6.600609000 | -5.444831000 | -0.821400000 | C | -6.253887638 | 4.901250793  | 1.557009862  |
| C | 2.185223000  | 5.256103000  | 1.711127000  | H | -5.943297636 | 5.870279113  | 1.987110842  |
| H | 2.691619000  | 5.576551000  | 2.618346000  | H | -6.856257509 | 4.386022656  | 2.321815452  |
| C | 0.852593000  | 4.424740000  | -0.592646000 | H | -6.909344571 | 5.122871812  | 0.700098855  |
| H | 0.341277000  | 4.113672000  | -1.495768000 | C | 2.408015780  | -5.104837452 | -1.815232484 |
| C | -2.430512000 | -1.719463000 | -2.680941000 | H | 2.914674949  | -5.388655319 | -2.741709661 |
| H | -2.311816000 | -0.713137000 | -2.272351000 | C | 1.085969084  | -4.371460228 | 0.532149108  |
| H | -3.020140000 | -1.650430000 | -3.601908000 | H | 0.580545014  | -4.096237257 | 1.456762524  |
| H | -1.423190000 | -2.056664000 | -2.949862000 | C | -2.599134493 | 1.615173321  | 2.720585964  |
| C | 1.530055000  | 5.642862000  | -0.575593000 | H | -2.408889451 | 0.605969335  | 2.337282774  |
| H | 1.533469000  | 6.263519000  | -1.468138000 | H | -3.187489105 | 1.536510064  | 3.647144105  |
| C | -1.618683000 | 1.938752000  | -2.743384000 | H | -1.608806260 | 2.023109183  | 2.978000003  |
| H | -0.871878000 | 2.346264000  | -3.436516000 | C | 1.821641349  | -5.556508755 | 0.481834936  |
| H | -2.389234000 | 1.451000000  | -3.351863000 | H | 1.876593761  | -6.192059098 | 1.369735621  |
| H | -1.118627000 | 1.178683000  | -2.141950000 | C | -1.551976328 | -1.971864187 | 2.776024160  |
| C | -2.758647000 | -3.714362000 | 1.974015000  | H | -0.807123366 | -2.316132088 | 3.511673671  |
| H | -1.765460000 | -4.158867000 | 2.095651000  | H | -2.380555185 | -1.523072666 | 3.345686644  |
| H | -3.466512000 | -4.300205000 | 2.569712000  | H | -1.078366923 | -1.187093268 | 2.177461190  |
| H | -2.708498000 | -2.703782000 | 2.390075000  | C | -2.928443083 | 3.514779942  | -1.972483853 |
| C | -2.455308000 | 4.196596000  | 0.245407000  | H | -2.070198020 | 4.195297121  | -2.083257585 |
| C | 2.206555000  | 6.064594000  | 0.571965000  | H | -3.728608826 | 3.869000609  | -2.639654654 |
| H | 2.736219000  | 7.013390000  | 0.580694000  | H | -2.591126454 | 2.528653905  | -2.311849986 |
| C | -5.006666000 | 0.633997000  | -1.632015000 | C | -2.146838761 | -4.370665932 | -0.169193313 |
| H | -4.557069000 | 1.510650000  | -2.107880000 | C | 2.492179834  | -5.929440071 | -0.687892852 |
| H | -6.093730000 | 0.770849000  | -1.583747000 | H | 3.070353075  | -6.856232638 | -0.722474585 |
| H | -4.787631000 | -0.253145000 | -2.232853000 | C | -4.828804311 | -0.998600861 | 1.507397907  |
| C | -5.344479000 | -0.929165000 | 0.729519000  | H | -4.381549521 | -1.889938024 | 1.967820214  |
| H | -5.204187000 | -1.838784000 | 0.141072000  |   |              |              |              |
| H | -6.404311000 | -0.646858000 | 0.712460000  |   |              |              |              |
| H | -5.051616000 | -1.147685000 | 1.761131000  |   |              |              |              |
| C | 6.638165000  | 1.090763000  | -0.800971000 |   |              |              |              |
| H | 7.246881000  | 0.304507000  | -0.346483000 |   |              |              |              |

|   |              |              |              |   |              |              |              |
|---|--------------|--------------|--------------|---|--------------|--------------|--------------|
| H | 7.195709000  | 2.033365000  | -0.742672000 | H | -5.904924877 | -1.173827324 | 1.351214417  |
| H | 6.485129000  | 0.834546000  | -1.854262000 | H | -4.699971876 | -0.135934523 | 2.175224887  |
| C | 3.631719000  | -0.398334000 | -3.512686000 | C | -5.120084107 | 0.636723529  | -0.795486229 |
| H | 4.534512000  | 0.220930000  | -3.458713000 | H | -5.209960629 | 1.472496022  | -0.091375152 |
| H | 3.121550000  | -0.195245000 | -4.462730000 | H | -6.117569462 | 0.207530088  | -0.978444500 |
| H | 3.945474000  | -1.447479000 | -3.506910000 | H | -4.709776472 | 1.023329843  | -1.736899963 |
| C | -4.437872000 | 6.100635000  | -2.422697000 | C | 6.639844653  | -0.729580377 | 0.783044742  |
| H | -4.852838000 | 5.736150000  | -3.368823000 | H | 7.193826027  | 0.110504381  | 0.343155571  |
| H | -3.864742000 | 7.010996000  | -2.645894000 | H | 7.259366746  | -1.637258004 | 0.702794483  |
| H | -5.275103000 | 6.398915000  | -1.780366000 | H | 6.464574798  | -0.507087803 | 1.845963923  |
| C | -2.246073000 | 4.273897000  | 1.733620000  | C | 3.602360364  | 0.538578083  | 3.508075266  |
| H | -2.588886000 | 3.344829000  | 2.199299000  | H | 4.529780535  | -0.049431505 | 3.429100853  |
| H | -2.804871000 | 5.108484000  | 2.169725000  | H | 3.104900941  | 0.297183297  | 4.461963825  |
| H | -1.191484000 | 4.390921000  | 1.999236000  | H | 3.874424675  | 1.604578663  | 3.512649474  |
| C | -4.994769000 | 1.893641000  | 0.920482000  | C | -3.927702770 | -6.401382038 | 2.550896283  |
| H | -4.707512000 | 1.875032000  | 1.976834000  | H | -4.328455580 | -6.078862263 | 3.524065415  |
| H | -6.089237000 | 1.906599000  | 0.851813000  | H | -3.272870796 | -7.271310805 | 2.735208719  |
| H | -4.594557000 | 2.809351000  | 0.477695000  | H | -4.770891682 | -6.760245706 | 1.938293711  |
| C | 5.185087000  | -2.969013000 | 1.256122000  | C | -1.869282648 | -4.521887327 | -1.639701744 |
| H | 5.906290000  | -2.307011000 | 1.747999000  | H | -1.803294245 | -3.540418050 | -2.117635585 |
| H | 5.665161000  | -3.934357000 | 1.054049000  | H | -2.654254125 | -5.113011124 | -2.136074767 |
| H | 4.352882000  | -3.129399000 | 1.948248000  | H | -0.905835560 | -5.025342858 | -1.815244655 |
| C | 1.067645000  | -1.055569000 | -2.502349000 | C | -4.522874772 | -2.124460914 | -1.090519479 |
| H | 1.280439000  | -2.119211000 | -2.360210000 | H | -4.131958838 | -2.039041122 | -2.113605901 |
| H | 0.752386000  | -0.878963000 | -3.538523000 | H | -5.621285871 | -2.192096116 | -1.124207961 |
| H | 0.249546000  | -0.796393000 | -1.826879000 | H | -4.115623136 | -3.037438779 | -0.639796461 |
| C | 3.666552000  | -3.563158000 | -1.077958000 | C | 4.941061856  | 3.254304083  | -1.261546920 |
| H | 2.725898000  | -3.745865000 | -0.556255000 | H | 5.679487431  | 2.616422185  | -1.770568866 |
| H | 4.262988000  | -4.483600000 | -1.075026000 | H | 5.386060763  | 4.243205654  | -1.064430511 |
| H | 3.425185000  | -3.308570000 | -2.115168000 | H | 4.079021004  | 3.376936677  | -1.932606114 |
| C | 5.634257000  | 1.565872000  | 1.783678000  | C | 1.000316454  | 1.123572419  | 2.520175956  |
| H | 4.800240000  | 1.817766000  | 2.445928000  | H | 1.172877451  | 2.198782800  | 2.375871437  |
| H | 6.361275000  | 2.386859000  | 1.805616000  | H | 0.706808293  | 0.928065238  | 3.564338979  |
| H | 6.106391000  | 0.657728000  | 2.174239000  | H | 0.181231037  | 0.831650202  | 1.851358885  |
| C | -0.635801000 | -1.147041000 | 3.719431000  | C | 3.428762180  | 3.758198830  | 1.112887272  |
| H | -0.812632000 | -2.143281000 | 3.311501000  | H | 2.453688539  | 3.870008691  | 0.622899302  |
| H | -0.695914000 | -1.182687000 | 4.814041000  | H | 3.964010150  | 4.720718270  | 1.082647967  |
| H | 0.372401000  | -0.843247000 | 3.425112000  | H | 3.249704474  | 3.487338397  | 2.164022205  |
| C | 4.569587000  | 2.949802000  | -0.466769000 | C | 5.656831236  | -1.207911101 | -1.819458493 |
| H | 4.542158000  | 2.986040000  | -1.560770000 | H | 4.830377555  | -1.511015892 | -2.478202146 |
| H | 5.310943000  | 3.679745000  | -0.119413000 | H | 6.450077987  | -1.971886412 | -1.862268933 |
| H | 3.582571000  | 3.235742000  | -0.097436000 | H | 6.049567011  | -0.249045101 | -2.189926489 |
| C | 6.137131000  | -2.241280000 | -1.292051000 | C | -0.626886653 | 1.003809024  | -3.738309703 |
| H | 5.994849000  | -1.755054000 | -2.261508000 | H | -0.780678262 | 2.016421970  | -3.344884940 |
| H | 6.438455000  | -3.282544000 | -1.458055000 | H | -0.649817491 | 1.024879804  | -4.839788972 |
| H | 6.950614000  | -1.728071000 | -0.773600000 | H | 0.360900471  | 0.664253975  | -3.398850965 |
| C | 1.916807000  | 1.618381000  | -2.554309000 | C | 4.686145533  | -2.710491379 | 0.409503814  |
| H | 1.162233000  | 1.932360000  | -1.832520000 | H | 4.661120741  | -2.763428154 | 1.507986881  |
| H | 1.472413000  | 1.597347000  | -3.556848000 | H | 5.475459967  | -3.388569580 | 0.047162922  |
| H | 2.722175000  | 2.356103000  | -2.536240000 | H | 3.713154734  | -3.047357678 | 0.029202117  |
| C | -1.174849000 | 1.599131000  | 3.857384000  | C | 5.978063523  | 2.572199371  | 1.273474046  |
| H | -0.334689000 | 1.970439000  | 3.264230000  | H | 5.881441578  | 2.054275077  | 2.238119720  |
| H | -0.836542000 | 1.382935000  | 4.877883000  | H | 6.216775380  | 3.632308621  | 1.455419472  |
| H | -1.934239000 | 2.383199000  | 3.899193000  |   |              |              |              |
| C | -3.320337000 | -0.252411000 | 4.122646000  |   |              |              |              |
| H | -4.103052000 | 0.487998000  | 3.922174000  |   |              |              |              |
| H | -3.066052000 | -0.211353000 | 5.188958000  |   |              |              |              |
| H | -3.730626000 | -1.243616000 | 3.901920000  |   |              |              |              |

|                      |              |              |              |   |              |              |              |
|----------------------|--------------|--------------|--------------|---|--------------|--------------|--------------|
| <b><sup>1</sup>R</b> |              |              |              | H | 6.811500756  | 2.117701733  | 0.722045423  |
| Co                   | -1.774788000 | -0.224359000 | -0.494758000 | C | 1.949497452  | -1.527002337 | 2.505293375  |
| Co                   | 3.357940000  | 0.446567000  | 0.000909000  | H | 1.179288433  | -1.831135319 | 1.787616840  |
| P                    | -1.900492000 | -0.153933000 | -2.904150000 | H | 1.532420053  | -1.554825947 | 3.524435839  |
| P                    | -4.026248000 | -0.595463000 | -0.156748000 | H | 2.780878303  | -2.238976458 | 2.431451982  |
| P                    | 2.544772000  | 0.146426000  | 2.037548000  | C | -1.326786008 | -1.707261275 | -3.911707329 |
| P                    | 5.022202000  | -1.008659000 | -0.114148000 | H | -0.449835058 | -2.088428176 | -3.369086862 |
| P                    | 4.440848000  | 2.356269000  | 0.274045000  | H | -1.055592193 | -1.517079734 | -4.963005249 |
| N                    | -1.662794000 | 1.743994000  | -0.035858000 | H | -2.114417129 | -2.473225763 | -3.882372918 |
| N                    | 0.060386000  | 0.045573000  | -0.714612000 | C | -3.348361105 | 0.265360165  | -4.177744312 |
| N                    | -1.108562000 | -2.110136000 | -0.148425000 | H | -4.181377643 | -0.429333673 | -3.988590963 |
| C                    | -0.425415000 | 2.273688000  | -0.386081000 | H | -3.076259222 | 0.210800403  | -5.245028676 |
| C                    | -0.321588000 | 4.381177000  | 0.979786000  | H | -3.698758467 | 1.284543905  | -3.956085721 |
| H                    | -0.773233000 | 3.844368000  | 1.813057000  |   |              |              |              |
| C                    | -0.091612000 | 3.702956000  | -0.234375000 |   |              |              |              |
| C                    | 0.866404000  | -1.048695000 | -0.894937000 |   |              |              |              |
| C                    | -2.729393000 | 2.585501000  | 0.364381000  |   |              |              |              |
| C                    | -4.971060000 | 4.123903000  | 1.213074000  |   |              |              |              |
| C                    | 0.217539000  | -2.251759000 | -0.557237000 |   |              |              |              |
| C                    | 0.539628000  | 1.325554000  | -0.767773000 |   |              |              |              |
| C                    | 0.495332000  | 4.429453000  | -1.291893000 |   |              |              |              |
| H                    | 0.650865000  | 3.934239000  | -2.252234000 |   |              |              |              |
| C                    | 0.039875000  | 5.720095000  | 1.135261000  |   |              |              |              |
| H                    | -0.142664000 | 6.219447000  | 2.090584000  |   |              |              |              |
| C                    | -4.472916000 | 4.222758000  | -0.090348000 |   |              |              |              |
| H                    | -4.969486000 | 4.892125000  | -0.800420000 |   |              |              |              |
| C                    | -1.787201000 | -3.170514000 | 0.507877000  |   |              |              |              |
| C                    | 2.260007000  | -0.832532000 | -1.285391000 |   |              |              |              |
| H                    | 2.772675000  | -1.706242000 | -1.657730000 |   |              |              |              |
| C                    | -3.209585000 | 2.489824000  | 1.695807000  |   |              |              |              |
| C                    | -3.375721000 | 3.472320000  | -0.532205000 |   |              |              |              |
| C                    | -2.730120000 | -4.104558000 | 2.555739000  |   |              |              |              |
| H                    | -2.900535000 | -4.013336000 | 3.633820000  |   |              |              |              |
| C                    | -2.020359000 | -3.084266000 | 1.902495000  |   |              |              |              |
| C                    | 2.650616000  | 0.465552000  | -1.807371000 |   |              |              |              |
| H                    | 3.290413000  | 0.608425000  | -2.670685000 |   |              |              |              |
| C                    | 1.935889000  | 1.535620000  | -1.137757000 |   |              |              |              |
| H                    | 2.191407000  | 2.551203000  | -1.395972000 |   |              |              |              |
| C                    | 0.864627000  | 5.766576000  | -1.133234000 |   |              |              |              |
| H                    | 1.321307000  | 6.304513000  | -1.968542000 |   |              |              |              |
| C                    | 0.942129000  | -3.541307000 | -0.569828000 |   |              |              |              |
| C                    | -4.320956000 | 3.244264000  | 2.088622000  |   |              |              |              |
| H                    | -4.683158000 | 3.150630000  | 3.117710000  |   |              |              |              |
| C                    | -2.956276000 | -5.311467000 | 0.505613000  |   |              |              |              |
| H                    | -3.320611000 | -6.180999000 | -0.051254000 |   |              |              |              |
| C                    | 0.640557000  | 6.420095000  | 0.083236000  |   |              |              |              |
| H                    | 0.926962000  | 7.467312000  | 0.208709000  |   |              |              |              |
| C                    | 1.614090000  | -3.964916000 | -1.737214000 |   |              |              |              |
| H                    | 1.549322000  | -3.350544000 | -2.637289000 |   |              |              |              |
| C                    | -3.208839000 | -5.229491000 | 1.882148000  |   |              |              |              |
| C                    | -6.143242000 | 4.957748000  | 1.670364000  |   |              |              |              |

|   |              |              |              |
|---|--------------|--------------|--------------|
| H | -5.805126000 | 5.914834000  | 2.106220000  |
| H | -6.732523000 | 4.440277000  | 2.443765000  |
| H | -6.818000000 | 5.202531000  | 0.835122000  |
| C | 2.341908000  | -5.155610000 | -1.765387000 |
| H | 2.853924000  | -5.455067000 | -2.683966000 |
| C | 1.009543000  | -4.379152000 | 0.561956000  |
| H | 0.500536000  | -4.088233000 | 1.479502000  |
| C | -2.499881000 | 1.614917000  | 2.693069000  |
| H | -2.256408000 | 0.638722000  | 2.261051000  |
| H | -3.097172000 | 1.471387000  | 3.606147000  |
| H | -1.535410000 | 2.058269000  | 2.988690000  |
| C | 1.730132000  | -5.574499000 | 0.530594000  |
| H | 1.768673000  | -6.201027000 | 1.425729000  |
| C | -1.487182000 | -1.941545000 | 2.728811000  |
| H | -0.702500000 | -2.294652000 | 3.416681000  |
| H | -2.277892000 | -1.492532000 | 3.349877000  |
| H | -1.054057000 | -1.160644000 | 2.095711000  |
| C | -2.930410000 | 3.583319000  | -1.964291000 |
| H | -2.053181000 | 4.240859000  | -2.066469000 |
| H | -3.730305000 | 3.984510000  | -2.604542000 |
| H | -2.629188000 | 2.601624000  | -2.344980000 |
| C | -2.262034000 | -4.316043000 | -0.188372000 |
| C | 2.405676000  | -5.968632000 | -0.628816000 |
| H | 2.972450000  | -6.902914000 | -0.648244000 |
| C | -4.730996000 | -0.919393000 | 1.518716000  |
| H | -4.264109000 | -1.816362000 | 1.945778000  |
| H | -5.818258000 | -1.078789000 | 1.442905000  |
| H | -4.541022000 | -0.058795000 | 2.172426000  |
| C | -5.189913000 | 0.716184000  | -0.739881000 |
| H | -5.217556000 | 1.535893000  | -0.012014000 |
| H | -6.202465000 | 0.297325000  | -0.849213000 |
| H | -4.858957000 | 1.126640000  | -1.701240000 |
| C | 6.650339000  | -0.797862000 | 0.757855000  |
| H | 7.209965000  | 0.037210000  | 0.315525000  |
| H | 7.261602000  | -1.710949000 | 0.675684000  |
| H | 6.480759000  | -0.573283000 | 1.821299000  |
| C | 3.629646000  | 0.538600000  | 3.497448000  |
| H | 4.561631000  | -0.043145000 | 3.425236000  |
| H | 3.133172000  | 0.302638000  | 4.453235000  |
| H | 3.893429000  | 1.606626000  | 3.492132000  |
| C | -3.971287000 | -6.321554000 | 2.592142000  |
| H | -4.056381000 | -6.123576000 | 3.671339000  |
| H | -3.478514000 | -7.300574000 | 2.466968000  |
| H | -4.993142000 | -6.425313000 | 2.188575000  |
| C | -2.057602000 | -4.448373000 | -1.671217000 |
| H | -2.354011000 | -3.521647000 | -2.173886000 |
| H | -2.646095000 | -5.280300000 | -2.085262000 |
| H | -1.000764000 | -4.617398000 | -1.924103000 |
| C | -4.677171000 | -2.067824000 | -1.063041000 |
| H | -4.375484000 | -2.032276000 | -2.118366000 |
| H | -5.776028000 | -2.101082000 | -1.002027000 |
| H | -4.264739000 | -2.980348000 | -0.615602000 |
| C | 4.981736000  | 3.189668000  | -1.292936000 |

|   |              |              |              |
|---|--------------|--------------|--------------|
| H | 5.716790000  | 2.544325000  | -1.797442000 |
| H | 5.431377000  | 4.178141000  | -1.104317000 |
| H | 4.119567000  | 3.310288000  | -1.964275000 |
| C | 1.022541000  | 1.087292000  | 2.498351000  |
| H | 1.192286000  | 2.163032000  | 2.353552000  |
| H | 0.720614000  | 0.892530000  | 3.540206000  |
| H | 0.212915000  | 0.788408000  | 1.821056000  |
| C | 3.480018000  | 3.721468000  | 1.081687000  |
| H | 2.508644000  | 3.844717000  | 0.587193000  |
| H | 4.027484000  | 4.677147000  | 1.052300000  |
| H | 3.291829000  | 3.454734000  | 2.132216000  |
| C | 5.650826000  | -1.263492000 | -1.841565000 |
| H | 4.818095000  | -1.559501000 | -2.495705000 |
| H | 6.438298000  | -2.033086000 | -1.890285000 |
| H | 6.047959000  | -0.306768000 | -2.212835000 |
| C | -0.685452000 | 1.032998000  | -3.636214000 |
| H | -0.793988000 | 2.029329000  | -3.192088000 |
| H | -0.820023000 | 1.091462000  | -4.727513000 |
| H | 0.328219000  | 0.677603000  | -3.408088000 |
| C | 4.680465000  | -2.763610000 | 0.388074000  |
| H | 4.671214000  | -2.822269000 | 1.486390000  |
| H | 5.458046000  | -3.447183000 | 0.010964000  |
| H | 3.698763000  | -3.089534000 | 0.020563000  |
| C | 6.019227000  | 2.513441000  | 1.244160000  |
| H | 5.918626000  | 2.004645000  | 2.213258000  |
| H | 6.269760000  | 3.572365000  | 1.416945000  |
| H | 6.846705000  | 2.045259000  | 0.695197000  |
| C | 2.005504000  | -1.554782000 | 2.514232000  |
| H | 1.247543000  | -1.879437000 | 1.792830000  |
| H | 1.580334000  | -1.577396000 | 3.530055000  |
| H | 2.850287000  | -2.252294000 | 2.457598000  |
| C | -1.338177000 | -1.693079000 | -3.759500000 |
| H | -0.509012000 | -2.132041000 | -3.187732000 |
| H | -1.006023000 | -1.468730000 | -4.785186000 |
| H | -2.157335000 | -2.422590000 | -3.805879000 |
| C | -3.405313000 | 0.239797000  | -3.922883000 |
| H | -4.227572000 | -0.446912000 | -3.675022000 |
| H | -3.182185000 | 0.151974000  | -4.998447000 |
| H | -3.741192000 | 1.266067000  | -3.717439000 |

## Reference

1. M. Hayashi, Y. Matsuura and Y. Watanabe, Regio- and Stereoselective Synthesis of Alkenylphosphines: A Rhodium-Catalyzed Hydrophosphination of Alkynes Using a Silylphosphine, *J. Org. Chem.*, 2006, **71**, 9248-9251.
2. A. Di Giuseppe, R. De Luca, R. Castarlenas, J. J. Perez-Torrente, M. Crucianelli and L. A. Oro, Double hydrophosphination of alkynes promoted by rhodium: the key role of an N-heterocyclic carbene ligand, *Chem. Commun.*, 2016, **52**, 5554-5557.
3. Q. Liu, C. Wang, X. Zhang, M. Xue, Y. Yao, Y. Zhang and Q. Shen, Synthesis and molecular structures of divalent bridged bis(guanidinate) europium complexes and their application in intermolecular hydrophosphination of alkenes and alkynes, *New J. Chem.*, 2016, **40**, 10447-10454.
4. J. Yuan, L. Zhu, J. Zhang, J. Li and C. Cui, Sequential addition of phosphine to alkynes for the selective synthesis of 1,2-diphosphinoethanes under catalysis. Well-defined NHC-copper phosphides vs. in situ CuCl<sub>2</sub>/NHC catalyst, *Organometallics*, 2017, **36**, 455-459.
5. B. J. Ackley, J. K. Pagano and R. Waterman, Visible-light and thermal driven double hydrophosphination of terminal alkynes using a commercially available iron compound, *Chem. Commun.*, 2018, **54**, 2774-2776.
